# Supplementary material for: Health Risk Assessment in Southern Carpathians Small Rural Communities Using Karst Springs as a Drinking Water Source
Source: MDPI journal article supplement (doi:10.3390/ijerph19010234), 2021-12-26
Supplement: s1 [file s1]

**Table S1.** Physico-chemical parameters of spring waters collected in October 2019 (A19), May 2020 (S20), November 2020 (A20), and Spring 2021 (S21).

| Spring | Season | pH                  | EC                | HCO <sub>3</sub> <sup>-</sup> | TU                | TH                | Na                | Mg                | K                 | Ca                | Fe                | Al                | Cr                | Mn                | Ni                | Cu                | Zn                | Sr                | Ba                | Pb                | As                | Cd                | TDS               | Cl <sup>-</sup>   | SO <sub>4</sub> <sup>2-</sup> | NO <sub>3</sub> <sup>-</sup> | NO <sub>2</sub> <sup>-</sup> | PO <sub>4</sub> <sup>3-</sup> | F <sup>-</sup> |
|--------|--------|---------------------|-------------------|-------------------------------|-------------------|-------------------|-------------------|-------------------|-------------------|-------------------|-------------------|-------------------|-------------------|-------------------|-------------------|-------------------|-------------------|-------------------|-------------------|-------------------|-------------------|-------------------|-------------------|-------------------|-------------------------------|------------------------------|------------------------------|-------------------------------|----------------|
|        |        | μS cm <sup>-1</sup> | mgL <sup>-1</sup> | NTU                           | mgL <sup>-1</sup> | μgL <sup>-1</sup> | mgL <sup>-1</sup> | mgL <sup>-1</sup> | mgL <sup>-1</sup>             | mgL <sup>-1</sup>            | mgL <sup>-1</sup>            | mgL <sup>-1</sup>             |                |
| GWR1   | A19    | 8.30                | 326               | 220                           | 3.60              | 181               | 1.44              | 0.95              | 0.82              | 70.9              | 20.2              | 4.46              | 1.11              | 0.60              | 2.70              | 1.05              | 2.00              | 18.5              | 7.50              | <LOD              | <LOD              | <LOD              | 340               | 1.07              | 6.55                          | 2.70                         | <LOD                         | <LOD                          | 0.07           |
|        | S20    | 8.10                | 317               | 210                           | 3.54              | 161               | 1.64              | 1.07              | 0.78              | 62.6              | 190               | 7.25              | 1.59              | 0.84              | 1.55              | 0.42              | 1.50              | 22.5              | 6.70              | <LOD              | <LOD              | <LOD              | 205               | 0.95              | 7.10                          | 1.83                         | <LOD                         | <LOD                          | 0.06           |
|        | A20    | 8.00                | 211               | 134                           | 2.18              | 105               | 2.01              | 1.16              | 1.25              | 39.9              | 60.9              | 16.1              | 2.59              | 1.71              | 1.29              | 0.57              | 7.88              | 14.2              | 10.5              | <LOD              | <LOD              | <LOD              | 150               | 1.13              | 6.30                          | 1.93                         | <LOD                         | <LOD                          | 0.12           |
|        | S21    | 8.30                | 227               | 140                           | 5.70              | 115               | 2.09              | 0.88              | 0.58              | 44.4              | 148               | 31.9              | 1.72              | 2.10              | 2.48              | 0.38              | 1.90              | 24.2              | 12.8              | <LOD              | <LOD              | <LOD              | 160               | 0.93              | 6.99                          | 2.06                         | <LOD                         | <LOD                          | 0.13           |
| GWR2   | A19    | 7.50                | 440               | 268                           | 0.20              | 208               | 4.37              | 6.39              | 1.30              | 72.7              | 28.8              | 8.56              | 0.20              | 0.50              | 2.99              | 0.35              | 0.80              | 36.4              | 14.7              | <LOD              | <LOD              | <LOD              | 377               | 4.39              | 10.1                          | 5.44                         | <LOD                         | <LOD                          | 0.25           |
|        | S20    | 7.90                | 349               | 212                           | 0.82              | 158               | 5.87              | 6.77              | 2.11              | 52.1              | 101               | 0.92              | 0.30              | 0.38              | 1.25              | 0.25              | 1.10              | 44.3              | 12.1              | <LOD              | <LOD              | <LOD              | 220               | 3.92              | 10.8                          | 6.88                         | <LOD                         | <LOD                          | 0.18           |
|        | A20    | 7.80                | 382               | 207                           | 0.40              | 173               | 5.15              | 6.77              | 1.82              | 57.9              | 16.2              | 5.70              | 0.39              | 1.82              | 2.66              | 0.49              | 0.68              | 34.0              | 23.1              | <LOD              | <LOD              | <LOD              | 230               | 4.35              | 12.5                          | 7.20                         | <LOD                         | <LOD                          | 0.24           |
|        | S21    | 7.70                | 366               | 207                           | 0.32              | 159               | 7.03              | 6.24              | 1.52              | 53.3              | 23.9              | 8.90              | 3.49              | 0.40              | 3.31              | 0.40              | 1.50              | 58.5              | 18.5              | <LOD              | <LOD              | <LOD              | 230               | 4.65              | 11.0                          | 5.63                         | <LOD                         | <LOD                          | 0.21           |
| GWR3   | A19    | 7.80                | 246               | 183                           | 0.06              | 153               | 1.61              | 2.97              | 0.60              | 56.2              | 26.9              | 7.94              | 0.30              | 0.40              | 1.18              | 0.30              | 0.70              | 15.0              | 5.30              | <LOD              | <LOD              | <LOD              | 197               | 1.20              | 5.97                          | 2.55                         | <LOD                         | <LOD                          | 0.10           |
|        | S20    | 7.70                | 359               | 222                           | 0.10              | 170               | 2.20              | 6.41              | 0.60              | 57.3              | 115               | 1.18              | 0.22              | 0.30              | 1.51              | 0.28              | 0.80              | 30.8              | 12.0              | <LOD              | <LOD              | <LOD              | 205               | 0.92              | 6.50                          | 3.00                         | <LOD                         | <LOD                          | 0.09           |
|        | A20    | 8.20                | 226               | 174                           | 0.11              | 135               | 1.50              | 2.91              | 0.65              | 49.2              | 13.3              | 3.50              | 0.26              | 1.31              | 1.63              | 0.35              | 0.60              | 22.6              | 7.52              | <LOD              | <LOD              | <LOD              | 120               | 0.89              | 6.10                          | 2.58                         | <LOD                         | <LOD                          | 0.17           |
|        | S21    | 7.90                | 453               | 293                           | 0.12              | 220               | 1.93              | 5.59              | 0.85              | 78.7              | 34.2              | 1.50              | 5.04              | 0.30              | 4.87              | 0.32              | 1.60              | 40.7              | 16.3              | <LOD              | <LOD              | <LOD              | 300               | 0.93              | 7.54                          | 2.83                         | <LOD                         | <LOD                          | 0.12           |
| GWR5   | A19    | 7.80                | 391               | 250                           | 0.02              | 223               | 1.20              | 1.00              | 0.49              | 87.7              | 13.8              | 2.04              | 0.20              | 0.30              | 3.26              | 0.28              | 0.90              | 29.2              | 5.30              | <LOD              | <LOD              | <LOD              | 439               | 2.09              | 8.28                          | 2.39                         | <LOD                         | <LOD                          | 0.06           |
|        | S20    | 7.60                | 395               | 262                           | 0.40              | 215               | 2.73              | 2.39              | 0.24              | 82.0              | 157               | 0.74              | 0.28              | 0.36              | 2.27              | 0.36              | 1.00              | 32.1              | 6.37              | <LOD              | <LOD              | <LOD              | 245               | 0.92              | 5.45                          | 1.95                         | <LOD                         | <LOD                          | 0.05           |
|        | A20    | 8.20                | 412               | 244                           | 0.05              | 196               | 1.00              | 1.20              | 0.48              | 76.3              | 19.3              | 0.80              | 0.57              | 1.45              | 3.24              | 0.25              | 0.80              | 22.0              | 7.21              | <LOD              | <LOD              | <LOD              | 220               | 1.70              | 6.90                          | 2.34                         | <LOD                         | <LOD                          | 0.11           |
|        | S21    | 7.80                | 359               | 212                           | 0.46              | 174               | 0.94              | 0.89              | 0.38              | 68.2              | 32.6              | 3.10              | 3.81              | 0.20              | 5.02              | 0.34              | 1.10              | 41.9              | 7.50              | <LOD              | <LOD              | <LOD              | 225               | 1.14              | 6.92                          | 1.93                         | <LOD                         | <LOD                          | 0.11           |
| GWR6   | A19    | 7.20                | 608               | 372                           | 0.16              | 323               | 8.89              | 5.00              | 0.70              | 121               | 24.3              | 7.34              | 0.30              | 0.45              | 4.49              | 0.34              | 0.90              | 141               | 13.6              | <LOD              | <LOD              | <LOD              | 387               | 25.2              | 10.7                          | 5.89                         | <LOD                         | <LOD                          | 0.12           |
|        | S20    | 7.60                | 628               | 336                           | 0.03              | 295               | 9.01              | 4.92              | 0.56              | 110               | 191               | 1.79              | 0.20              | 0.32              | 2.43              | 0.46              | 0.70              | 149               | 14.4              | <LOD              | <LOD              | <LOD              | 390               | 33.0              | 9.59                          | 4.76                         | <LOD                         | <LOD                          | 0.09           |
|        | A20    | 7.60                | 633               | 342                           | 0.11              | 285               | 10.4              | 3.67              | 0.69              | 108               | 22.6              | 2.70              | 0.48              | 4.12              | 4.68              | 0.64              | 0.96              | 141               | 21.2              | <LOD              | <LOD              | <LOD              | 390               | 33.0              | 11.0                          | 3.50                         | <LOD                         | <LOD                          | 0.14           |
|        | S21    | 7.40                | 694               | 313                           | 0.72              | 308               | 20.4              | 2.55              | 0.33              | 119               | 32.3              | 3.90              | 6.35              | 0.20              | 7.82              | 0.50              | 1.00              | 164               | 25.1              | <LOD              | <LOD              | <LOD              | 470               | 66.0              | 12.0                          | 4.70                         | <LOD                         | <LOD                          | 0.06           |
| GWR7   | A19    | 7.40                | 525               | 290                           | 1.91              | 241               | 1.71              | 5.60              | 0.35              | 87.3              | 22.8              | 6.07              | 1.00              | 2.20              | 4.11              | 0.52              | 0.80              | 57.0              | 4.50              | <LOD              | <LOD              | <LOD              | 417               | 3.03              | 10.7                          | 0.87                         | <LOD                         | <LOD                          | 0.10           |
|        | S20    | 7.70                | 517               | 319                           | 0.40              | 238               | 2.17              | 6.50              | 0.06              | 84.5              | 187               | 0.98              | 1.50              | 15.5              | 2.70              | 1.38              | 1.10              | 65.2              | 6.81              | <LOD              | <LOD              | <LOD              | 305               | 1.73              | 12.7                          | 0.26                         | <LOD                         | <LOD                          | 0.08           |
|        | A20    | 8.00                | 482               | 305                           | 0.10              | 281               | 1.83              | 6.84              | 1.08              | 101               | 4.83              | 0.49              | 1.89              | 1.67              | 4.46              | 0.43              | 2.25              | 66.1              | 11.4              | <LOD              | <LOD              | <LOD              | 320               | 1.43              | 21.9                          | 8.69                         | <LOD                         | <LOD                          | 0.13           |
|        | S21    | 7.60                | 508               | 324                           | 0.38              | 265               | 1.72              | 4.81              | 0.23              | 98.1              | 30.4              | 0.90              | 5.49              | 16.6              | 6.41              | 0.62              | 1.40              | 78.8              | 12.3              | <LOD              | <LOD              | <LOD              | 320               | 1.70              | 15.0                          | 1.42                         | <LOD                         | <LOD                          | 0.14           |
| GWR8   | A19    | 7.80                | 539               | 346                           | 0.02              | 285               | 0.90              | 1.14              | 0.57              | 112               | 20.2              | 2.03              | 0.20              | 0.40              | 4.68              | 0.28              | 0.70              | 37.1              | 7.30              | <LOD              | <LOD              | <LOD              | 470               | 1.11              | 10.2                          | 6.00                         | <LOD                         | <LOD                          | 0.08           |
|        | S20    | 7.90                | 440               | 295                           | 1.60              | 237               | 1.00              | 1.27              | 0.40              | 92.9              | 219               | 1.01              | 0.40              | 0.60              | 2.49              | 0.33              | 0.90              | 53.5              | 11.9              | <LOD              | <LOD              | <LOD              | 280               | 1.60              | 12.3                          | 5.65                         | <LOD                         | <LOD                          | 0.07           |
|        | A20    | 8.20                | 548               | 342                           | 0.08              | 278               | 1.00              | 1.43              | 0.55              | 109               | 22.2              | 0.60              | 0.43              | 1.77              | 4.35              | 0.30              | 0.97              | 44.0              | 10.4              | <LOD              | <LOD              | <LOD              | 325               | 1.34              | 12.0                          | 4.80                         | <LOD                         | <LOD                          | 0.13           |
|        | S21    | 7.90                | 539               | 314                           | 0.47              | 246               | 1.27              | 1.36              | 0.31              | 96.2              | 42.9              | 1.00              | 6.25              | 0.10              | 7.82              | 0.29              | 1.00              | 68.1              | 12.9              | <LOD              | <LOD              | <LOD              | 400               | 1.26              | 12.0                          | 3.64                         | <LOD                         | <LOD                          | 0.13           |
| GWR9   | A19    | 7.80                | 237               | 134                           | 0.05              | 124               | 1.41              | 3.95              | 0.65              | 43.0              | 3.30              | 0.80              | 2.27              | 1.20              | 2.25              | 0.28              | 1.00              | 10.5              | 2.90              | <LOD              | <LOD              | <LOD              | 146               | 0.98              | 12.0                          | 11.0                         | <LOD                         | <LOD                          | 0.13           |
|        | S20    | 8.10                | 241               | 134                           | 2.30              | 138               | 0.57              | 4.31              | 0.96              | 48.2              | 165               | 2.28              | 1.43              | 0.50              | 2.07              | 0.39              | 2.30              | 16.8              | 5.08              | <LOD              | <LOD              | <LOD              | 175               | 0.88              | 12.2                          | 9.55                         | <LOD                         | <LOD                          | 0.13           |
|        | A20    | 7.70                | 253               | 134                           | 0.24              | 111               | 1.05              | 4.10              | 0.68              | 37.6              | 16.0              | 1.30              | 1.29              | 0.30              | 3.28              | 0.71              | 5.70              | 11.8              | 5.08              | <LOD              | <LOD              | <LOD              | 170               | 0.57              | 1.85                          | 1.30                         | <LOD                         | <LOD                          | 0.11           |
|        | S21    | 8.00                | 254               | 140                           | 0.33              | 123               | 0.38              | 3.59              | 0.62              | 43.3              | 81.3              | 3.20              | 0.22              | 0.31              | 1.34              | 0.42              | 0.84              | 16.5              | 6.38              | <LOD              | <LOD              | <LOD              | 165               | 0.95              | 11.8                          | 10.5                         | <LOD                         | <LOD                          | 0.07           |
|        | GV*    | 6.5–8.5             | 2500              | 500                           | NA                | 500               | 200               | NA                | NA                | NA                | 200               | NA                | 50                | 100               | 70                | 2000              | NA                | NA                | 1300              | 10                | 10                | 3                 | NA                | NA                | 250                           | 50                           | 3                            | NA                            | 1.50           |
|        | PV**   | 6.5–9.5             | 2500              | NA                            | NA                | NA                | 200               | NA                | NA                | NA                | 200               | 200               | 25                | 50                | 20                | 2000              | NA                | NA                | NA                | 5                 | 10                | 5                 | NA                | 250               | 250                           | 50                           | 0.50                         | NA                            | 1.50           |

\* GV-guideline value according to the World Health Organizations Guidelines for Drinking-Water Quality [19], \*\* PV\*\*-parametric values calculated based on parametric value according to the European Directive 2020/2184 [20].

**Table S2.** Average Daily Dose (ADD,  $\mu\text{g kg}^{-1} \text{ day}^{-1}$ ) of metals and nitrate through the oral and dermal pathways for those in the adult age category exposed to spring waters collected in October 2019 (A19), May 2020 (S20), November 2020 (A20), and Spring 2021 (S21).

| Spring Season |     | Adults                  |                         |                         |                         |                         |                         |                         |                         |                              |                         |                         |                         |                         |                         |                         |                         |                         |                              |
|---------------|-----|-------------------------|-------------------------|-------------------------|-------------------------|-------------------------|-------------------------|-------------------------|-------------------------|------------------------------|-------------------------|-------------------------|-------------------------|-------------------------|-------------------------|-------------------------|-------------------------|-------------------------|------------------------------|
|               |     | ADD <sub>oral</sub>     |                         |                         |                         |                         |                         |                         |                         |                              | ADD <sub>dermal</sub>   |                         |                         |                         |                         |                         |                         |                         |                              |
|               |     | Fe                      | Al                      | Cr                      | Mn                      | Ni                      | Cu                      | Zn                      | Ba                      | NO <sub>3</sub> <sup>-</sup> | Fe                      | Al                      | Cr                      | Mn                      | Ni                      | Cu                      | Zn                      | Ba                      | NO <sub>3</sub> <sup>-</sup> |
| GWR1          | A19 | 6.35 × 10 <sup>-1</sup> | 1.40 × 10 <sup>-1</sup> | 3.49 × 10 <sup>-2</sup> | 1.89 × 10 <sup>-2</sup> | 8.49 × 10 <sup>-2</sup> | 3.30 × 10 <sup>-2</sup> | 6.29 × 10 <sup>-2</sup> | 2.36 × 10 <sup>-1</sup> | 8.49 × 10 <sup>1</sup>       | 2.89 × 10 <sup>-3</sup> | 6.38 × 10 <sup>-4</sup> | 1.59 × 10 <sup>-4</sup> | 8.58 × 10 <sup>-5</sup> | 7.72 × 10 <sup>-5</sup> | 1.50 × 10 <sup>-4</sup> | 1.72 × 10 <sup>-4</sup> | 1.07 × 10 <sup>-3</sup> | 3.99                         |
|               | S20 | 5.97                    | 2.28 × 10 <sup>-1</sup> | 5.00 × 10 <sup>-2</sup> | 2.64 × 10 <sup>-2</sup> | 4.87 × 10 <sup>-2</sup> | 1.32 × 10 <sup>-2</sup> | 4.71 × 10 <sup>-2</sup> | 2.11 × 10 <sup>-1</sup> | 5.75 × 10 <sup>1</sup>       | 2.72 × 10 <sup>-2</sup> | 1.04 × 10 <sup>-3</sup> | 2.27 × 10 <sup>-4</sup> | 1.20 × 10 <sup>-4</sup> | 4.43 × 10 <sup>-5</sup> | 6.01 × 10 <sup>-5</sup> | 1.29 × 10 <sup>-4</sup> | 9.58 × 10 <sup>-4</sup> | 2.71                         |
|               | A20 | 1.91                    | 5.06 × 10 <sup>-1</sup> | 8.14 × 10 <sup>-2</sup> | 5.37 × 10 <sup>-2</sup> | 4.05 × 10 <sup>-2</sup> | 1.79 × 10 <sup>-2</sup> | 2.48 × 10 <sup>-1</sup> | 3.30 × 10 <sup>-1</sup> | 6.07 × 10 <sup>1</sup>       | 8.71 × 10 <sup>-3</sup> | 2.30 × 10 <sup>-3</sup> | 3.70 × 10 <sup>-4</sup> | 2.45 × 10 <sup>-4</sup> | 3.69 × 10 <sup>-5</sup> | 8.15 × 10 <sup>-5</sup> | 6.76 × 10 <sup>-4</sup> | 1.50 × 10 <sup>-3</sup> | 2.86                         |
|               | S21 | 4.65                    | 1.00                    | 5.41 × 10 <sup>-2</sup> | 6.60 × 10 <sup>-2</sup> | 7.79 × 10 <sup>-2</sup> | 1.19 × 10 <sup>-2</sup> | 5.97 × 10 <sup>-2</sup> | 4.02 × 10 <sup>-1</sup> | 6.47 × 10 <sup>1</sup>       | 2.12 × 10 <sup>-2</sup> | 4.56 × 10 <sup>-3</sup> | 2.46 × 10 <sup>-4</sup> | 3.00 × 10 <sup>-4</sup> | 7.09 × 10 <sup>-5</sup> | 5.43 × 10 <sup>-5</sup> | 1.63 × 10 <sup>-4</sup> | 1.83 × 10 <sup>-3</sup> | 3.05                         |
| GWR2          | A19 | 9.05 × 10 <sup>-1</sup> | 2.69 × 10 <sup>-1</sup> | 6.29 × 10 <sup>-3</sup> | 1.57 × 10 <sup>-2</sup> | 9.40 × 10 <sup>-2</sup> | 1.10 × 10 <sup>-2</sup> | 2.51 × 10 <sup>-2</sup> | 4.62 × 10 <sup>-1</sup> | 1.71 × 10 <sup>2</sup>       | 4.12 × 10 <sup>-3</sup> | 1.22 × 10 <sup>-3</sup> | 2.86 × 10 <sup>-5</sup> | 7.15 × 10 <sup>-5</sup> | 8.55 × 10 <sup>-5</sup> | 5.01 × 10 <sup>-5</sup> | 6.86 × 10 <sup>-5</sup> | 2.10 × 10 <sup>-3</sup> | 8.05                         |
|               | S20 | 3.17                    | 2.89 × 10 <sup>-2</sup> | 9.43 × 10 <sup>-3</sup> | 1.19 × 10 <sup>-2</sup> | 3.93 × 10 <sup>-2</sup> | 7.86 × 10 <sup>-3</sup> | 3.46 × 10 <sup>-2</sup> | 3.80 × 10 <sup>-1</sup> | 2.16 × 10 <sup>2</sup>       | 1.44 × 10 <sup>-2</sup> | 1.32 × 10 <sup>-4</sup> | 4.29 × 10 <sup>-5</sup> | 5.43 × 10 <sup>-5</sup> | 3.58 × 10 <sup>-5</sup> | 3.58 × 10 <sup>-5</sup> | 9.44 × 10 <sup>-5</sup> | 1.73 × 10 <sup>-3</sup> | 1.02 × 10 <sup>1</sup>       |
|               | A20 | 5.09 × 10 <sup>-1</sup> | 1.79 × 10 <sup>-1</sup> | 1.23 × 10 <sup>-2</sup> | 5.72 × 10 <sup>-2</sup> | 8.36 × 10 <sup>-2</sup> | 1.54 × 10 <sup>-2</sup> | 2.14 × 10 <sup>-2</sup> | 7.26 × 10 <sup>-1</sup> | 2.26 × 10 <sup>2</sup>       | 2.32 × 10 <sup>-3</sup> | 8.15 × 10 <sup>-4</sup> | 5.58 × 10 <sup>-5</sup> | 2.60 × 10 <sup>-4</sup> | 7.61 × 10 <sup>-5</sup> | 7.01 × 10 <sup>-5</sup> | 5.83 × 10 <sup>-5</sup> | 3.30 × 10 <sup>-3</sup> | 1.07 × 10 <sup>1</sup>       |
|               | S21 | 7.51 × 10 <sup>-1</sup> | 2.80 × 10 <sup>-1</sup> | 1.10 × 10 <sup>-1</sup> | 1.26 × 10 <sup>-1</sup> | 1.04 × 10 <sup>-1</sup> | 1.26 × 10 <sup>-2</sup> | 4.71 × 10 <sup>-2</sup> | 5.81 × 10 <sup>-1</sup> | 1.77 × 10 <sup>2</sup>       | 3.42 × 10 <sup>-3</sup> | 1.27 × 10 <sup>-3</sup> | 4.99 × 10 <sup>-4</sup> | 5.72 × 10 <sup>-5</sup> | 9.47 × 10 <sup>-5</sup> | 5.72 × 10 <sup>-5</sup> | 1.29 × 10 <sup>-4</sup> | 2.65 × 10 <sup>-3</sup> | 8.33                         |
| GWR3          | A19 | 8.45 × 10 <sup>-1</sup> | 2.50 × 10 <sup>-1</sup> | 9.43 × 10 <sup>-3</sup> | 1.26 × 10 <sup>-2</sup> | 3.71 × 10 <sup>-2</sup> | 9.43 × 10 <sup>-3</sup> | 2.20 × 10 <sup>-2</sup> | 1.67 × 10 <sup>-1</sup> | 8.01 × 10 <sup>1</sup>       | 3.85 × 10 <sup>-3</sup> | 1.14 × 10 <sup>-3</sup> | 4.29 × 10 <sup>-5</sup> | 5.72 × 10 <sup>-5</sup> | 3.38 × 10 <sup>-5</sup> | 4.29 × 10 <sup>-5</sup> | 6.01 × 10 <sup>-5</sup> | 7.58 × 10 <sup>-4</sup> | 3.77                         |
|               | S20 | 3.61                    | 3.71 × 10 <sup>-2</sup> | 6.91 × 10 <sup>-3</sup> | 9.43 × 10 <sup>-3</sup> | 4.75 × 10 <sup>-2</sup> | 8.80 × 10 <sup>-3</sup> | 2.51 × 10 <sup>-2</sup> | 3.77 × 10 <sup>-1</sup> | 9.43 × 10 <sup>1</sup>       | 1.64 × 10 <sup>-2</sup> | 1.69 × 10 <sup>-4</sup> | 3.15 × 10 <sup>-5</sup> | 4.29 × 10 <sup>-5</sup> | 4.32 × 10 <sup>-5</sup> | 4.00 × 10 <sup>-5</sup> | 6.86 × 10 <sup>-5</sup> | 1.72 × 10 <sup>-3</sup> | 4.44                         |
|               | A20 | 4.18 × 10 <sup>-1</sup> | 1.10 × 10 <sup>-1</sup> | 8.17 × 10 <sup>-3</sup> | 4.12 × 10 <sup>-2</sup> | 5.12 × 10 <sup>-2</sup> | 1.10 × 10 <sup>-2</sup> | 1.89 × 10 <sup>-2</sup> | 2.36 × 10 <sup>-1</sup> | 8.11 × 10 <sup>1</sup>       | 1.90 × 10 <sup>-3</sup> | 5.01 × 10 <sup>-4</sup> | 3.72 × 10 <sup>-5</sup> | 1.87 × 10 <sup>-4</sup> | 4.66 × 10 <sup>-5</sup> | 5.01 × 10 <sup>-5</sup> | 5.15 × 10 <sup>-5</sup> | 1.08 × 10 <sup>-3</sup> | 3.82                         |
|               | S21 | 1.07                    | 4.71 × 10 <sup>-2</sup> | 1.58 × 10 <sup>-1</sup> | 9.43 × 10 <sup>-3</sup> | 1.53 × 10 <sup>-1</sup> | 1.01 × 10 <sup>-2</sup> | 5.03 × 10 <sup>-2</sup> | 5.12 × 10 <sup>-1</sup> | 8.89 × 10 <sup>1</sup>       | 4.89 × 10 <sup>-3</sup> | 2.15 × 10 <sup>-4</sup> | 7.21 × 10 <sup>-4</sup> | 4.29 × 10 <sup>-5</sup> | 1.39 × 10 <sup>-4</sup> | 4.58 × 10 <sup>-5</sup> | 1.37 × 10 <sup>-4</sup> | 2.33 × 10 <sup>-3</sup> | 4.19                         |
| GWR5          | A19 | 4.34 × 10 <sup>-1</sup> | 6.41 × 10 <sup>-2</sup> | 6.29 × 10 <sup>-3</sup> | 9.43 × 10 <sup>-3</sup> | 1.02 × 10 <sup>-1</sup> | 8.80 × 10 <sup>-3</sup> | 2.83 × 10 <sup>-2</sup> | 1.67 × 10 <sup>-1</sup> | 7.51 × 10 <sup>1</sup>       | 1.97 × 10 <sup>-3</sup> | 2.92 × 10 <sup>-4</sup> | 2.86 × 10 <sup>-5</sup> | 4.29 × 10 <sup>-5</sup> | 9.32 × 10 <sup>-5</sup> | 4.00 × 10 <sup>-5</sup> | 7.72 × 10 <sup>-5</sup> | 7.58 × 10 <sup>-4</sup> | 3.54                         |
|               | S20 | 4.93                    | 2.33 × 10 <sup>-2</sup> | 8.80 × 10 <sup>-3</sup> | 1.13 × 10 <sup>-2</sup> | 7.13 × 10 <sup>-2</sup> | 1.13 × 10 <sup>-2</sup> | 3.14 × 10 <sup>-2</sup> | 2.00 × 10 <sup>-1</sup> | 6.13 × 10 <sup>1</sup>       | 2.25 × 10 <sup>-2</sup> | 1.06 × 10 <sup>-4</sup> | 4.00 × 10 <sup>-5</sup> | 5.15 × 10 <sup>-5</sup> | 6.49 × 10 <sup>-5</sup> | 5.15 × 10 <sup>-5</sup> | 8.58 × 10 <sup>-5</sup> | 9.11 × 10 <sup>-4</sup> | 2.88                         |
|               | A20 | 6.07 × 10 <sup>-1</sup> | 2.51 × 10 <sup>-2</sup> | 1.79 × 10 <sup>-2</sup> | 4.56 × 10 <sup>-2</sup> | 1.02 × 10 <sup>-1</sup> | 7.86 × 10 <sup>-3</sup> | 2.51 × 10 <sup>-2</sup> | 2.27 × 10 <sup>-1</sup> | 7.35 × 10 <sup>1</sup>       | 2.76 × 10 <sup>-3</sup> | 1.14 × 10 <sup>-4</sup> | 8.15 × 10 <sup>-5</sup> | 2.07 × 10 <sup>-4</sup> | 9.27 × 10 <sup>-5</sup> | 3.58 × 10 <sup>-5</sup> | 6.86 × 10 <sup>-5</sup> | 1.03 × 10 <sup>-3</sup> | 3.46                         |
|               | S21 | 1.02                    | 9.74 × 10 <sup>-2</sup> | 1.20 × 10 <sup>-1</sup> | 6.29 × 10 <sup>-3</sup> | 1.58 × 10 <sup>-1</sup> | 1.07 × 10 <sup>-2</sup> | 3.46 × 10 <sup>-2</sup> | 2.36 × 10 <sup>-1</sup> | 6.07 × 10 <sup>1</sup>       | 4.66 × 10 <sup>-3</sup> | 4.43 × 10 <sup>-4</sup> | 5.45 × 10 <sup>-4</sup> | 2.86 × 10 <sup>-5</sup> | 1.44 × 10 <sup>-4</sup> | 4.86 × 10 <sup>-5</sup> | 9.44 × 10 <sup>-5</sup> | 1.07 × 10 <sup>-3</sup> | 2.86                         |
| GWR6          | A19 | 7.64 × 10 <sup>-1</sup> | 2.31 × 10 <sup>-1</sup> | 9.43 × 10 <sup>-3</sup> | 1.41 × 10 <sup>-2</sup> | 1.41 × 10 <sup>-1</sup> | 1.07 × 10 <sup>-2</sup> | 2.83 × 10 <sup>-2</sup> | 4.27 × 10 <sup>-1</sup> | 1.85 × 10 <sup>2</sup>       | 3.48 × 10 <sup>-3</sup> | 1.05 × 10 <sup>-3</sup> | 4.29 × 10 <sup>-5</sup> | 6.44 × 10 <sup>-5</sup> | 1.28 × 10 <sup>-4</sup> | 4.86 × 10 <sup>-5</sup> | 7.72 × 10 <sup>-5</sup> | 1.94 × 10 <sup>-3</sup> | 8.71                         |
|               | S20 | 6.00                    | 5.63 × 10 <sup>-2</sup> | 6.29 × 10 <sup>-3</sup> | 1.01 × 10 <sup>-2</sup> | 7.64 × 10 <sup>-2</sup> | 1.45 × 10 <sup>-2</sup> | 2.20 × 10 <sup>-2</sup> | 4.53 × 10 <sup>-1</sup> | 1.50 × 10 <sup>2</sup>       | 2.73 × 10 <sup>-2</sup> | 2.56 × 10 <sup>-4</sup> | 2.86 × 10 <sup>-5</sup> | 4.58 × 10 <sup>-5</sup> | 6.95 × 10 <sup>-5</sup> | 6.58 × 10 <sup>-5</sup> | 6.01 × 10 <sup>-5</sup> | 2.06 × 10 <sup>-3</sup> | 7.04                         |
|               | A20 | 7.10 × 10 <sup>-1</sup> | 8.49 × 10 <sup>-2</sup> | 1.51 × 10 <sup>-2</sup> | 1.29 × 10 <sup>-1</sup> | 1.47 × 10 <sup>-1</sup> | 2.01 × 10 <sup>-2</sup> | 3.02 × 10 <sup>-2</sup> | 6.66 × 10 <sup>-1</sup> | 1.10 × 10 <sup>2</sup>       | 3.23 × 10 <sup>-3</sup> | 3.86 × 10 <sup>-4</sup> | 6.86 × 10 <sup>-5</sup> | 5.89 × 10 <sup>-4</sup> | 1.34 × 10 <sup>-4</sup> | 9.15 × 10 <sup>-5</sup> | 8.24 × 10 <sup>-5</sup> | 3.03 × 10 <sup>-3</sup> | 5.18                         |
|               | S21 | 1.02                    | 1.23 × 10 <sup>-1</sup> | 2.00 × 10 <sup>-1</sup> | 6.29 × 10 <sup>-3</sup> | 2.46 × 10 <sup>-1</sup> | 1.57 × 10 <sup>-2</sup> | 3.14 × 10 <sup>-2</sup> | 7.89 × 10 <sup>-1</sup> | 1.48 × 10 <sup>2</sup>       | 4.62 × 10 <sup>-3</sup> | 5.58 × 10 <sup>-4</sup> | 9.08 × 10 <sup>-4</sup> | 2.86 × 10 <sup>-5</sup> | 2.24 × 10 <sup>-4</sup> | 7.15 × 10 <sup>-5</sup> | 8.58 × 10 <sup>-5</sup> | 3.59 × 10 <sup>-3</sup> | 6.95                         |
| GWR7          | A19 | 7.17 × 10 <sup>-1</sup> | 1.91 × 10 <sup>-1</sup> | 3.14 × 10 <sup>-2</sup> | 6.91 × 10 <sup>-2</sup> | 1.29 × 10 <sup>-1</sup> | 1.63 × 10 <sup>-2</sup> | 2.51 × 10 <sup>-2</sup> | 1.41 × 10 <sup>-1</sup> | 2.73 × 10 <sup>1</sup>       | 3.26 × 10 <sup>-3</sup> | 8.68 × 10 <sup>-4</sup> | 1.43 × 10 <sup>-4</sup> | 3.15 × 10 <sup>-4</sup> | 1.18 × 10 <sup>-4</sup> | 7.44 × 10 <sup>-5</sup> | 6.86 × 10 <sup>-5</sup> | 6.44 × 10 <sup>-4</sup> | 1.29                         |
|               | S20 | 5.88                    | 3.08 × 10 <sup>-2</sup> | 4.71 × 10 <sup>-2</sup> | 4.87 × 10 <sup>-1</sup> | 8.49 × 10 <sup>-2</sup> | 4.34 × 10 <sup>-2</sup> | 3.46 × 10 <sup>-2</sup> | 2.14 × 10 <sup>-1</sup> | 8.17                         | 2.67 × 10 <sup>-2</sup> | 1.40 × 10 <sup>-4</sup> | 2.15 × 10 <sup>-4</sup> | 2.22 × 10 <sup>-3</sup> | 7.72 × 10 <sup>-5</sup> | 1.97 × 10 <sup>-4</sup> | 9.44 × 10 <sup>-5</sup> | 9.74 × 10 <sup>-4</sup> | 3.85 × 10 <sup>-1</sup>      |
|               | A20 | 1.52 × 10 <sup>-1</sup> | 1.54 × 10 <sup>-2</sup> | 5.94 × 10 <sup>-2</sup> | 5.25 × 10 <sup>-2</sup> | 1.40 × 10 <sup>-1</sup> | 1.35 × 10 <sup>-2</sup> | 7.07 × 10 <sup>-2</sup> | 3.58 × 10 <sup>-1</sup> | 2.73 × 10 <sup>2</sup>       | 6.91 × 10 <sup>-4</sup> | 7.01 × 10 <sup>-5</sup> | 2.70 × 10 <sup>-4</sup> | 2.39 × 10 <sup>-4</sup> | 1.28 × 10 <sup>-4</sup> | 6.15 × 10 <sup>-5</sup> | 1.93 × 10 <sup>-4</sup> | 1.63 × 10 <sup>-3</sup> | 1.29 × 10 <sup>1</sup>       |
|               | S21 | 9.55 × 10 <sup>-1</sup> | 2.83 × 10 <sup>-2</sup> | 1.73 × 10 <sup>-1</sup> | 5.22 × 10 <sup>-1</sup> | 2.01 × 10 <sup>-1</sup> | 1.95 × 10 <sup>-2</sup> | 4.40 × 10 <sup>-2</sup> | 3.87 × 10 <sup>-1</sup> | 4.46 × 10 <sup>1</sup>       | 4.35 × 10 <sup>-3</sup> | 1.29 × 10 <sup>-4</sup> | 7.85 × 10 <sup>-4</sup> | 2.37 × 10 <sup>-3</sup> | 1.83 × 10 <sup>-4</sup> | 8.87 × 10 <sup>-5</sup> | 1.20 × 10 <sup>-4</sup> | 1.76 × 10 <sup>-3</sup> | 2.10                         |
| GWR8          | A19 | 6.35 × 10 <sup>-1</sup> | 6.38 × 10 <sup>-2</sup> | 6.29 × 10 <sup>-3</sup> | 1.26 × 10 <sup>-2</sup> | 1.47 × 10 <sup>-1</sup> | 8.80 × 10 <sup>-3</sup> | 2.20 × 10 <sup>-2</sup> | 2.29 × 10 <sup>-1</sup> | 1.89 × 10 <sup>2</sup>       | 2.89 × 10 <sup>-3</sup> | 2.90 × 10 <sup>-4</sup> | 2.86 × 10 <sup>-5</sup> | 5.72 × 10 <sup>-5</sup> | 1.34 × 10 <sup>-4</sup> | 4.00 × 10 <sup>-5</sup> | 6.01 × 10 <sup>-5</sup> | 1.04 × 10 <sup>-3</sup> | 8.88                         |
|               | S20 | 6.88                    | 3.17 × 10 <sup>-2</sup> | 1.26 × 10 <sup>-2</sup> | 1.89 × 10 <sup>-2</sup> | 7.83 × 10 <sup>-2</sup> | 1.04 × 10 <sup>-2</sup> | 2.83 × 10 <sup>-2</sup> | 3.74 × 10 <sup>-1</sup> | 1.78 × 10 <sup>2</sup>       | 3.13 × 10 <sup>-2</sup> | 1.44 × 10 <sup>-4</sup> | 5.72 × 10 <sup>-5</sup> | 8.58 × 10 <sup>-5</sup> | 7.12 × 10 <sup>-5</sup> | 4.72 × 10 <sup>-5</sup> | 7.72 × 10 <sup>-5</sup> | 1.70 × 10 <sup>-3</sup> | 8.36                         |
|               | A20 | 6.98 × 10 <sup>-1</sup> | 1.89 × 10 <sup>-2</sup> | 1.35 × 10 <sup>-2</sup> | 5.56 × 10 <sup>-2</sup> | 1.37 × 10 <sup>-1</sup> | 9.43 × 10 <sup>-3</sup> | 3.05 × 10 <sup>-2</sup> | 3.27 × 10 <sup>-1</sup> | 1.51 × 10 <sup>2</sup>       | 3.17 × 10 <sup>-3</sup> | 8.58 × 10 <sup>-5</sup> | 6.15 × 10 <sup>-5</sup> | 2.53 × 10 <sup>-4</sup> | 1.24 × 10 <sup>-4</sup> | 4.29 × 10 <sup>-5</sup> | 8.32 × 10 <sup>-5</sup> | 1.49 × 10 <sup>-3</sup> | 7.10                         |
|               | S21 | 1.35                    | 3.14 × 10 <sup>-2</sup> | 1.96 × 10 <sup>-1</sup> | 3.14 × 10 <sup>-3</sup> | 2.46 × 10 <sup>-1</sup> | 9.11 × 10 <sup>-3</sup> | 3.14 × 10 <sup>-2</sup> | 4.05 × 10 <sup>-1</sup> | 1.14 × 10 <sup>2</sup>       | 6.14 × 10 <sup>-3</sup> | 1.43 × 10 <sup>-4</sup> | 8.94 × 10 <sup>-4</sup> | 1.43 × 10 <sup>-5</sup> | 2.24 × 10 <sup>-4</sup> | 4.15 × 10 <sup>-5</sup> | 8.58 × 10 <sup>-5</sup> | 1.84 × 10 <sup>-3</sup> | 5.39                         |
| GWR9          | A19 | 1.04 × 10 <sup>-1</sup> | 2.51 × 10 <sup>-2</sup> | 7.13 × 10 <sup>-2</sup> | 3.77 × 10 <sup>-2</sup> | 7.07 × 10 <sup>-2</sup> | 8.80 × 10 <sup>-3</sup> | 3.14 × 10 <sup>-2</sup> | 9.11 × 10 <sup>-2</sup> | 3.46 × 10 <sup>2</sup>       | 4.72 × 10 <sup>-4</sup> | 1.14 × 10 <sup>-4</sup> | 3.25 × 10 <sup>-4</sup> | 1.72 × 10 <sup>-4</sup> | 6.44 × 10 <sup>-5</sup> | 4.00 × 10 <sup>-5</sup> | 8.58 × 10 <sup>-5</sup> | 4.15 × 10 <sup>-4</sup> | 1.63 × 10 <sup>1</sup>       |
|               | S20 | 5.19                    | 7.17 × 10 <sup>-2</sup> | 4.49 × 10 <sup>-2</sup> | 1.57 × 10 <sup>-2</sup> | 6.51 × 10 <sup>-2</sup> | 1.23 × 10 <sup>-2</sup> | 7.23 × 10 <sup>-2</sup> | 1.60 × 10 <sup>-1</sup> | 3.00 × 10 <sup>2</sup>       | 2.36 × 10 <sup>-2</sup> | 3.26 × 10 <sup>-4</sup> | 2.05 × 10 <sup>-4</sup> | 7.15 × 10 <sup>-5</sup> | 5.92 × 10 <sup>-5</sup> | 5.58 × 10 <sup>-5</sup> | 1.97 × 10 <sup>-4</sup> | 7.27 × 10 <sup>-4</sup> | 1.41 × 10 <sup>1</sup>       |
|               | A20 | 5.03 × 10 <sup>-1</sup> | 4.09 × 10 <sup>-2</sup> | 4.05 × 10 <sup>-2</sup> | 9.43 × 10 <sup>-3</sup> | 1.03 × 10 <sup>-1</sup> | 2.23 × 10 <sup>-2</sup> | 1.79 × 10 <sup>-1</sup> | 1.60 × 10 <sup>-1</sup> | 4.09 × 10 <sup>1</sup>       | 2.29 × 10 <sup>-3</sup> | 1.86 × 10 <sup>-4</sup> | 1.84 × 10 <sup>-4</sup> | 4.29 × 10 <sup>-5</sup> | 9.38 × 10 <sup>-5</sup> | 1.02 × 10 <sup>-4</sup> | 4.89 × 10 <sup>-4</sup> | 7.27 × 10 <sup>-4</sup> | 1.92                         |
|               | S21 | 2.56                    | 1.01 × 10 <sup>-1</sup> | 6.91 × 10 <sup>-3</sup> | 9.74 × 10 <sup>-3</sup> | 4.21 × 10 <sup>-2</sup> | 1.32 × 10 <sup>-2</sup> | 2.64 × 10 <sup>-2</sup> | 2.01 × 10 <sup>-1</sup> | 3.30 × 10 <sup>2</sup>       | 1.16 × 10 <sup>-2</sup> | 4.58 × 10 <sup>-4</sup> | 3.15 × 10 <sup>-5</sup> | 4.43 × 10 <sup>-5</sup> | 3.83 × 10 <sup>-5</sup> | 6.01 × 10 <sup>-5</sup> | 7.21 × 10 <sup>-5</sup> | 9.12 × 10 <sup>-4</sup> | 1.55 × 10 <sup>1</sup>       |

**Table S3.** Average Daily Dose (ADD,  $\mu\text{g kg}^{-1} \text{ day}^{-1}$ ) of metals and nitrate through the oral and dermal pathways for those in the children age category exposed to spring waters collected in October 2019 (A19), May 2020 (S20), November 2020 (A20), and Spring 2021 (S21).

| Spring | Season | Children                |                         |                         |                         |                         |                              |                         |                         |                              |                         |                         |                         |                         |                         |                         |                         |                         |                              |
|--------|--------|-------------------------|-------------------------|-------------------------|-------------------------|-------------------------|------------------------------|-------------------------|-------------------------|------------------------------|-------------------------|-------------------------|-------------------------|-------------------------|-------------------------|-------------------------|-------------------------|-------------------------|------------------------------|
|        |        | ADD <sub>oral</sub>     |                         |                         |                         |                         |                              |                         |                         |                              | ADD <sub>dermal</sub>   |                         |                         |                         |                         |                         |                         |                         |                              |
|        |        | Fe                      | Al                      | Cr                      | Mn                      | Ni                      | Cu                           | Zn                      | Ba                      | NO <sub>3</sub> <sup>-</sup> | Fe                      | Al                      | Cr                      | Mn                      | Ni                      | Cu                      | Zn                      | Ba                      | NO <sub>3</sub> <sup>-</sup> |
| GWR1   | A19    | 8.08 × 10 <sup>-1</sup> | 1.78 × 10 <sup>-1</sup> | 4.44 × 10 <sup>-2</sup> | 2.40 × 10 <sup>-2</sup> | 1.08 × 10 <sup>-1</sup> | 4.20 × 10 <sup>-2</sup>      | 8.00 × 10 <sup>-2</sup> | 3.00 × 10 <sup>-1</sup> | 1.08 × 10 <sup>2</sup>       | 5.11 × 10 <sup>-3</sup> | 1.13 × 10 <sup>-3</sup> | 5.62 × 10 <sup>-4</sup> | 1.52 × 10 <sup>-4</sup> | 1.37 × 10 <sup>-4</sup> | 2.66 × 10 <sup>-4</sup> | 3.04 × 10 <sup>-4</sup> | 1.90 × 10 <sup>-3</sup> | 4.10                         |
|        | S20    | 7.60                    | 2.90 × 10 <sup>-1</sup> | 6.36 × 10 <sup>-2</sup> | 3.36 × 10 <sup>-2</sup> | 6.20 × 10 <sup>-2</sup> | 1.68 × 10 <sup>-2</sup>      | 6.00 × 10 <sup>-2</sup> | 2.68 × 10 <sup>-1</sup> | 7.32 × 10 <sup>1</sup>       | 4.81 × 10 <sup>-2</sup> | 1.84 × 10 <sup>-3</sup> | 8.05 × 10 <sup>-4</sup> | 2.13 × 10 <sup>-4</sup> | 7.85 × 10 <sup>-5</sup> | 1.06 × 10 <sup>-4</sup> | 2.28 × 10 <sup>-4</sup> | 1.70 × 10 <sup>-3</sup> | 2.78                         |
|        | A20    | 2.44                    | 6.44 × 10 <sup>-1</sup> | 1.04 × 10 <sup>-1</sup> | 6.84 × 10 <sup>-2</sup> | 5.16 × 10 <sup>-2</sup> | 2.28 × 10 <sup>-2</sup>      | 3.15 × 10 <sup>-1</sup> | 4.20 × 10 <sup>-1</sup> | 7.72 × 10 <sup>1</sup>       | 1.54 × 10 <sup>-2</sup> | 4.08 × 10 <sup>-3</sup> | 1.31 × 10 <sup>-3</sup> | 4.33 × 10 <sup>-4</sup> | 6.53 × 10 <sup>-5</sup> | 1.44 × 10 <sup>-4</sup> | 1.20 × 10 <sup>-3</sup> | 2.66 × 10 <sup>-3</sup> | 2.93                         |
|        | S21    | 5.92                    | 1.28                    | 6.88 × 10 <sup>-2</sup> | 8.40 × 10 <sup>-2</sup> | 9.92 × 10 <sup>-2</sup> | 1.52 × 10 <sup>-2</sup>      | 7.60 × 10 <sup>-2</sup> | 5.12 × 10 <sup>-1</sup> | 8.24 × 10 <sup>1</sup>       | 3.75 × 10 <sup>-2</sup> | 8.08 × 10 <sup>-3</sup> | 8.71 × 10 <sup>-4</sup> | 5.32 × 10 <sup>-4</sup> | 1.26 × 10 <sup>-4</sup> | 9.62 × 10 <sup>-5</sup> | 2.89 × 10 <sup>-4</sup> | 3.24 × 10 <sup>-3</sup> | 3.13                         |
| GWR2   | A19    | 1.15                    | 3.42 × 10 <sup>-1</sup> | 8.00 × 10 <sup>-3</sup> | 2.00 × 10 <sup>-2</sup> | 1.20 × 10 <sup>-1</sup> | 1.40 × 10 <sup>-2</sup>      | 3.20 × 10 <sup>-2</sup> | 5.88 × 10 <sup>-1</sup> | 2.18 × 10 <sup>2</sup>       | 7.29 × 10 <sup>-3</sup> | 2.17 × 10 <sup>-3</sup> | 1.01 × 10 <sup>-4</sup> | 1.27 × 10 <sup>-4</sup> | 1.51 × 10 <sup>-4</sup> | 8.86 × 10 <sup>-5</sup> | 1.22 × 10 <sup>-4</sup> | 3.72 × 10 <sup>-3</sup> | 8.26                         |
|        | S20    | 4.04                    | 3.68 × 10 <sup>-2</sup> | 1.20 × 10 <sup>-2</sup> | 1.52 × 10 <sup>-2</sup> | 5.00 × 10 <sup>-2</sup> | 1.00 × 10 <sup>-2</sup>      | 4.40 × 10 <sup>-2</sup> | 4.84 × 10 <sup>-1</sup> | 2.75 × 10 <sup>2</sup>       | 2.56 × 10 <sup>-2</sup> | 2.33 × 10 <sup>-4</sup> | 1.52 × 10 <sup>-4</sup> | 9.62 × 10 <sup>-5</sup> | 6.33 × 10 <sup>-5</sup> | 6.33 × 10 <sup>-5</sup> | 1.67 × 10 <sup>-4</sup> | 3.06 × 10 <sup>-3</sup> | 1.05 × 10 <sup>1</sup>       |
|        | A20    | 6.48 × 10 <sup>-1</sup> | 2.28 × 10 <sup>-1</sup> | 1.56 × 10 <sup>-2</sup> | 7.28 × 10 <sup>-2</sup> | 1.06 × 10 <sup>-1</sup> | 1.96 × 10 <sup>-2</sup>      | 2.72 × 10 <sup>-2</sup> | 9.24 × 10 <sup>-1</sup> | 2.88 × 10 <sup>2</sup>       | 4.10 × 10 <sup>-3</sup> | 1.44 × 10 <sup>-3</sup> | 1.97 × 10 <sup>-4</sup> | 4.61 × 10 <sup>-4</sup> | 1.35 × 10 <sup>-4</sup> | 1.24 × 10 <sup>-4</sup> | 1.03 × 10 <sup>-4</sup> | 5.85 × 10 <sup>-3</sup> | 1.09 × 10 <sup>1</sup>       |
|        | S21    | 9.56 × 10 <sup>-1</sup> | 3.56 × 10 <sup>-1</sup> | 1.40 × 10 <sup>-1</sup> | 1.60 × 10 <sup>-2</sup> | 1.32 × 10 <sup>-1</sup> | 1.60 × 10 <sup>-2</sup>      | 6.00 × 10 <sup>-2</sup> | 7.40 × 10 <sup>-1</sup> | 2.25 × 10 <sup>2</sup>       | 6.05 × 10 <sup>-3</sup> | 2.25 × 10 <sup>-3</sup> | 1.77 × 10 <sup>-3</sup> | 1.01 × 10 <sup>-4</sup> | 1.68 × 10 <sup>-4</sup> | 1.01 × 10 <sup>-4</sup> | 2.28 × 10 <sup>-4</sup> | 4.68 × 10 <sup>-3</sup> | 8.55                         |
| GWR3   | A19    | 1.08                    | 3.18 × 10 <sup>-1</sup> | 1.20 × 10 <sup>-2</sup> | 1.60 × 10 <sup>-2</sup> | 4.72 × 10 <sup>-2</sup> | 1.20 × 10 <sup>-2</sup>      | 2.80 × 10 <sup>-2</sup> | 2.12 × 10 <sup>-1</sup> | 1.02 × 10 <sup>2</sup>       | 6.81 × 10 <sup>-3</sup> | 2.01 × 10 <sup>-3</sup> | 1.52 × 10 <sup>-4</sup> | 1.01 × 10 <sup>-4</sup> | 5.97 × 10 <sup>-5</sup> | 7.59 × 10 <sup>-5</sup> | 1.06 × 10 <sup>-4</sup> | 1.34 × 10 <sup>-3</sup> | 3.87                         |
|        | S20    | 4.60                    | 4.72 × 10 <sup>-2</sup> | 8.80 × 10 <sup>-3</sup> | 1.20 × 10 <sup>-2</sup> | 6.04 × 10 <sup>-2</sup> | 1.12 × 10 <sup>-2</sup>      | 3.20 × 10 <sup>-2</sup> | 4.80 × 10 <sup>-1</sup> | 1.20 × 10 <sup>2</sup>       | 2.91 × 10 <sup>-2</sup> | 2.99 × 10 <sup>-4</sup> | 1.11 × 10 <sup>-4</sup> | 7.59 × 10 <sup>-5</sup> | 7.65 × 10 <sup>-5</sup> | 7.09 × 10 <sup>-5</sup> | 1.22 × 10 <sup>-4</sup> | 3.04 × 10 <sup>-3</sup> | 4.56                         |
|        | A20    | 5.32 × 10 <sup>-1</sup> | 1.40 × 10 <sup>-1</sup> | 1.04 × 10 <sup>-2</sup> | 5.24 × 10 <sup>-2</sup> | 6.52 × 10 <sup>-2</sup> | 1.40 × 10 <sup>-2</sup>      | 2.40 × 10 <sup>-2</sup> | 3.01 × 10 <sup>-1</sup> | 1.03 × 10 <sup>2</sup>       | 3.37 × 10 <sup>-3</sup> | 8.86 × 10 <sup>-4</sup> | 1.32 × 10 <sup>-4</sup> | 3.32 × 10 <sup>-4</sup> | 8.25 × 10 <sup>-5</sup> | 8.86 × 10 <sup>-5</sup> | 9.11 × 10 <sup>-5</sup> | 1.90 × 10 <sup>-3</sup> | 3.92                         |
|        | S21    | 1.37                    | 6.00 × 10 <sup>-2</sup> | 2.02 × 10 <sup>-1</sup> | 1.20 × 10 <sup>-2</sup> | 1.95 × 10 <sup>-1</sup> | 1.28 × 10 <sup>-2</sup>      | 6.40 × 10 <sup>-2</sup> | 6.52 × 10 <sup>-1</sup> | 1.13 × 10 <sup>2</sup>       | 8.66 × 10 <sup>-3</sup> | 3.80 × 10 <sup>-4</sup> | 2.55 × 10 <sup>-3</sup> | 7.59 × 10 <sup>-5</sup> | 2.47 × 10 <sup>-4</sup> | 8.10 × 10 <sup>-5</sup> | 2.43 × 10 <sup>-4</sup> | 4.13 × 10 <sup>-3</sup> | 4.30                         |
| GWR5   | A19    | 5.52 × 10 <sup>-1</sup> | 8.16 × 10 <sup>-2</sup> | 8.00 × 10 <sup>-3</sup> | 1.20 × 10 <sup>-2</sup> | 1.30 × 10 <sup>-1</sup> | 1.12 × 10 <sup>-2</sup>      | 3.60 × 10 <sup>-2</sup> | 2.12 × 10 <sup>-1</sup> | 9.56 × 10 <sup>1</sup>       | 3.49 × 10 <sup>-3</sup> | 5.16 × 10 <sup>-4</sup> | 1.01 × 10 <sup>-4</sup> | 7.59 × 10 <sup>-5</sup> | 1.65 × 10 <sup>-4</sup> | 7.09 × 10 <sup>-5</sup> | 1.37 × 10 <sup>-4</sup> | 1.34 × 10 <sup>-3</sup> | 3.63                         |
|        | S20    | 6.28                    | 2.96 × 10 <sup>-2</sup> | 1.12 × 10 <sup>-2</sup> | 1.44 × 10 <sup>-2</sup> | 9.08 × 10 <sup>-2</sup> | 1.44 × 10 <sup>-2</sup>      | 4.00 × 10 <sup>-2</sup> | 2.55 × 10 <sup>-1</sup> | 7.80 × 10 <sup>1</sup>       | 3.97 × 10 <sup>-2</sup> | 1.87 × 10 <sup>-4</sup> | 1.42 × 10 <sup>-4</sup> | 9.11 × 10 <sup>-5</sup> | 1.15 × 10 <sup>-4</sup> | 9.11 × 10 <sup>-5</sup> | 1.52 × 10 <sup>-4</sup> | 1.61 × 10 <sup>-3</sup> | 2.96                         |
|        | A20    | 7.72 × 10 <sup>-1</sup> | 3.20 × 10 <sup>-2</sup> | 2.28 × 10 <sup>-2</sup> | 5.80 × 10 <sup>-2</sup> | 1.30 × 10 <sup>-1</sup> | 1.00 × 10 <sup>-2</sup>      | 3.20 × 10 <sup>-2</sup> | 2.88 × 10 <sup>-1</sup> | 9.36 × 10 <sup>1</sup>       | 4.89 × 10 <sup>-3</sup> | 2.03 × 10 <sup>-4</sup> | 2.89 × 10 <sup>-4</sup> | 3.67 × 10 <sup>-4</sup> | 1.64 × 10 <sup>-4</sup> | 6.33 × 10 <sup>-5</sup> | 1.22 × 10 <sup>-4</sup> | 1.83 × 10 <sup>-3</sup> | 3.55                         |
|        | S21    | 1.30                    | 1.24 × 10 <sup>-1</sup> | 1.52 × 10 <sup>-1</sup> | 8.00 × 10 <sup>-3</sup> | 2.01 × 10 <sup>-1</sup> | 1.36 × 10 <sup>-2</sup>      | 4.40 × 10 <sup>-2</sup> | 3.00 × 10 <sup>-1</sup> | 7.72 × 10 <sup>1</sup>       | 8.25 × 10 <sup>-3</sup> | 7.85 × 10 <sup>-4</sup> | 1.93 × 10 <sup>-3</sup> | 5.06 × 10 <sup>-5</sup> | 2.54 × 10 <sup>-4</sup> | 8.61 × 10 <sup>-5</sup> | 1.67 × 10 <sup>-4</sup> | 1.90 × 10 <sup>-3</sup> | 2.93                         |
| GWR6   | A19    | 9.72 × 10 <sup>-1</sup> | 2.94 × 10 <sup>-1</sup> | 1.20 × 10 <sup>-2</sup> | 1.80 × 10 <sup>-2</sup> | 1.80 × 10 <sup>-1</sup> | 1.36 × 10 <sup>-2</sup>      | 3.60 × 10 <sup>-2</sup> | 5.44 × 10 <sup>-1</sup> | 2.36 × 10 <sup>2</sup>       | 6.15 × 10 <sup>-3</sup> | 1.86 × 10 <sup>-3</sup> | 1.52 × 10 <sup>-4</sup> | 1.14 × 10 <sup>-4</sup> | 2.27 × 10 <sup>-4</sup> | 8.61 × 10 <sup>-5</sup> | 1.37 × 10 <sup>-4</sup> | 3.44 × 10 <sup>-3</sup> | 8.95                         |
|        | S20    | 7.64                    | 7.16 × 10 <sup>-2</sup> | 8.00 × 10 <sup>-3</sup> | 1.28 × 10 <sup>-2</sup> | 9.72 × 10 <sup>-2</sup> | 1.84 × 10 <sup>-2</sup>      | 2.80 × 10 <sup>-2</sup> | 5.76 × 10 <sup>-1</sup> | 1.90 × 10 <sup>2</sup>       | 4.84 × 10 <sup>-2</sup> | 4.53 × 10 <sup>-4</sup> | 1.01 × 10 <sup>-4</sup> | 8.10 × 10 <sup>-5</sup> | 1.23 × 10 <sup>-4</sup> | 1.16 × 10 <sup>-4</sup> | 1.06 × 10 <sup>-4</sup> | 3.65 × 10 <sup>-3</sup> | 7.23                         |
|        | A20    | 9.04 × 10 <sup>-1</sup> | 1.08 × 10 <sup>-1</sup> | 1.92 × 10 <sup>-2</sup> | 1.65 × 10 <sup>-1</sup> | 1.87 × 10 <sup>-1</sup> | 2.56 × 10 <sup>-2</sup>      | 3.84 × 10 <sup>-2</sup> | 8.48 × 10 <sup>-1</sup> | 1.40 × 10 <sup>2</sup>       | 5.72 × 10 <sup>-3</sup> | 6.84 × 10 <sup>-4</sup> | 2.43 × 10 <sup>-4</sup> | 1.04 × 10 <sup>-3</sup> | 2.37 × 10 <sup>-4</sup> | 1.62 × 10 <sup>-4</sup> | 1.46 × 10 <sup>-4</sup> | 5.37 × 10 <sup>-3</sup> | 5.32                         |
|        | S21    | 1.29                    | 1.56 × 10 <sup>-1</sup> | 2.54 × 10 <sup>-1</sup> | 8.00 × 10 <sup>-3</sup> | 3.13 × 10 <sup>-1</sup> | 2.00 × 10 <sup>-2</sup>      | 4.00 × 10 <sup>-2</sup> | 1.00                    | 1.88 × 10 <sup>2</sup>       | 8.18 × 10 <sup>-3</sup> | 9.87 × 10 <sup>-4</sup> | 3.22 × 10 <sup>-3</sup> | 5.06 × 10 <sup>-5</sup> | 3.96 × 10 <sup>-4</sup> | 1.27 × 10 <sup>-4</sup> | 1.52 × 10 <sup>-4</sup> | 6.35 × 10 <sup>-3</sup> | 7.14                         |
| GWR7   | A19    | 9.12 × 10 <sup>-1</sup> | 2.43 × 10 <sup>-1</sup> | 4.00 × 10 <sup>-2</sup> | 8.80 × 10 <sup>-2</sup> | 1.64 × 10 <sup>-1</sup> | 2.08 × 10 <sup>-2</sup>      | 3.20 × 10 <sup>-2</sup> | 1.80 × 10 <sup>-1</sup> | 3.48 × 10 <sup>1</sup>       | 5.77 × 10 <sup>-3</sup> | 1.54 × 10 <sup>-3</sup> | 5.06 × 10 <sup>-4</sup> | 5.57 × 10 <sup>-4</sup> | 2.08 × 10 <sup>-4</sup> | 1.32 × 10 <sup>-4</sup> | 1.22 × 10 <sup>-4</sup> | 1.14 × 10 <sup>-3</sup> | 1.32                         |
|        | S20    | 7.48                    | 3.92 × 10 <sup>-2</sup> | 6.00 × 10 <sup>-2</sup> | 6.20 × 10 <sup>-1</sup> | 1.08 × 10 <sup>-1</sup> | 5.52 × 10 <sup>-2</sup>      | 4.40 × 10 <sup>-2</sup> | 2.72 × 10 <sup>-1</sup> | 1.04 × 10 <sup>1</sup>       | 4.73 × 10 <sup>-2</sup> | 2.48 × 10 <sup>-4</sup> | 7.59 × 10 <sup>-4</sup> | 3.92 × 10 <sup>-3</sup> | 1.37 × 10 <sup>-4</sup> | 3.49 × 10 <sup>-4</sup> | 1.67 × 10 <sup>-4</sup> | 1.72 × 10 <sup>-3</sup> | 3.95 × 10 <sup>1</sup>       |
|        | A20    | 1.93 × 10 <sup>-1</sup> | 1.96 × 10 <sup>-2</sup> | 7.56 × 10 <sup>-2</sup> | 6.68 × 10 <sup>-2</sup> | 1.78 × 10 <sup>-1</sup> | 1.72 × 10 <sup>-2</sup>      | 9.00 × 10 <sup>-2</sup> | 4.56 × 10 <sup>-1</sup> | 3.48 × 10 <sup>2</sup>       | 1.22 × 10 <sup>-3</sup> | 1.24 × 10 <sup>-4</sup> | 9.57 × 10 <sup>-4</sup> | 4.23 × 10 <sup>-4</sup> | 2.26 × 10 <sup>-4</sup> | 1.09 × 10 <sup>-4</sup> | 3.42 × 10 <sup>-4</sup> | 2.89 × 10 <sup>-3</sup> | 1.32 × 10 <sup>1</sup>       |
|        | S21    | 1.22                    | 3.60 × 10 <sup>-2</sup> | 2.20 × 10 <sup>-1</sup> | 6.64 × 10 <sup>-1</sup> | 2.56 × 10 <sup>-1</sup> | 2.48 × 10 <sup>-2</sup>      | 5.60 × 10 <sup>-2</sup> | 4.92 × 10 <sup>-1</sup> | 5.68 × 10 <sup>1</sup>       | 7.70 × 10 <sup>-3</sup> | 2.28 × 10 <sup>-4</sup> | 2.78 × 10 <sup>-3</sup> | 4.20 × 10 <sup>-3</sup> | 3.25 × 10 <sup>-4</sup> | 1.57 × 10 <sup>-4</sup> | 2.13 × 10 <sup>-4</sup> | 3.11 × 10 <sup>-3</sup> | 2.16                         |
| GWR8   | A19    | 8.08 × 10 <sup>-1</sup> | 8.12 × 10 <sup>-2</sup> | 8.00 × 10 <sup>-3</sup> | 1.60 × 10 <sup>-2</sup> | 1.87 × 10 <sup>-1</sup> | 1.12 × 10 <sup>-2</sup>      | 2.80 × 10 <sup>-2</sup> | 2.92 × 10 <sup>-1</sup> | 2.40 × 10 <sup>2</sup>       | 5.11 × 10 <sup>-3</sup> | 5.14 × 10 <sup>-4</sup> | 1.01 × 10 <sup>-4</sup> | 1.01 × 10 <sup>-4</sup> | 2.37 × 10 <sup>-4</sup> | 7.09 × 10 <sup>-5</sup> | 1.06 × 10 <sup>-4</sup> | 1.85 × 10 <sup>-3</sup> | 9.11                         |
|        | S20    | 8.76                    | 4.04 × 10 <sup>-2</sup> | 1.60 × 10 <sup>-2</sup> | 2.40 × 10 <sup>-2</sup> | 9.96 × 10 <sup>-2</sup> | 1.32 × 10 <sup>-2</sup>      | 3.60 × 10 <sup>-2</sup> | 4.76 × 10 <sup>-1</sup> | 2.26 × 10 <sup>2</sup>       | 5.54 × 10 <sup>-2</sup> | 2.56 × 10 <sup>-4</sup> | 2.03 × 10 <sup>-4</sup> | 1.52 × 10 <sup>-4</sup> | 1.26 × 10 <sup>-4</sup> | 8.35 × 10 <sup>-5</sup> | 1.37 × 10 <sup>-4</sup> | 3.01 × 10 <sup>-3</sup> | 8.58                         |
|        | A20    | 8.88 × 10 <sup>-1</sup> | 2.40 × 10 <sup>-2</sup> | 1.72 × 10 <sup>-2</sup> | 7.08 × 10 <sup>-2</sup> | 1.74 × 10 <sup>-1</sup> | 1.20 × 10 <sup>-2</sup>      | 3.88 × 10 <sup>-2</sup> | 4.16 × 10 <sup>-1</sup> | 1.92 × 10 <sup>2</sup>       | 5.62 × 10 <sup>-3</sup> | 1.52 × 10 <sup>-4</sup> | 2.18 × 10 <sup>-4</sup> | 4.48 × 10 <sup>-4</sup> | 2.20 × 10 <sup>-4</sup> | 7.59 × 10 <sup>-5</sup> | 1.47 × 10 <sup>-4</sup> | 2.63 × 10 <sup>-3</sup> | 7.29                         |
|        | S21    | 1.72                    | 4.00 × 10 <sup>-2</sup> | 2.50 × 10 <sup>-1</sup> | 4.00 × 10 <sup>-3</sup> | 3.13 × 10 <sup>-1</sup> | 1.16 × 10 <sup>-2</sup>      | 4.00 × 10 <sup>-2</sup> | 5.16 × 10 <sup>-1</sup> | 1.46 × 10 <sup>2</sup>       | 1.09 × 10 <sup>-2</sup> | 2.53 × 10 <sup>-4</sup> | 3.16 × 10 <sup>-4</sup> | 2.53 × 10 <sup>-5</sup> | 3.96 × 10 <sup>-4</sup> | 7.34 × 10 <sup>-5</sup> | 1.52 × 10 <sup>-4</sup> | 3.27 × 10 <sup>-3</sup> | 5.53                         |
| GWR9   | A19    | 1.32 × 10 <sup>-1</sup> | 3.20 × 10 <sup>-2</sup> | 9.08 × 10 <sup>-2</sup> | 4.80 × 10 <sup>-2</sup> | 9.00 × 10 <sup>-2</sup> | 1.12 × 10 <sup>-2</sup>      | 4.00 × 10 <sup>-2</sup> | 1.16 × 10 <sup>-1</sup> | 4.40 × 10 <sup>2</sup>       | 8.35 × 10 <sup>-4</sup> | 2.03 × 10 <sup>-4</sup> | 1.15 × 10 <sup>-3</sup> | 3.04 × 10 <sup>-4</sup> | 1.14 × 10 <sup>-4</sup> | 7.09 × 10 <sup>-5</sup> | 1.52 × 10 <sup>-4</sup> | 7.34 × 10 <sup>-4</sup> | 1.67 × 10 <sup>1</sup>       |
|        | S20    | 6.60                    | 9.12 × 10 <sup>-2</sup> | 5.72 × 10 <sup>-2</sup> | 2.00 × 10 <sup>-2</sup> | 8.28 × 10 <sup>-2</sup> | 1.56 × 10 <sup>-2</sup>      | 9.20 × 10 <sup>-2</sup> | 2.03 × 10 <sup>-1</sup> | 3.82 × 10 <sup>2</sup>       | 4.18 × 10 <sup>-2</sup> | 5.77 × 10 <sup>-4</sup> | 7.24 × 10 <sup>-4</sup> | 1.27 × 10 <sup>-4</sup> | 1.05 × 10 <sup>-4</sup> | 9.87 × 10 <sup>-5</sup> | 3.49 × 10 <sup>-4</sup> | 1.29 × 10 <sup>-3</sup> | 1.45 × 10 <sup>1</sup>       |
|        | A20    | 6.40 × 10 <sup>-1</sup> | 5.20 × 10 <sup>-2</sup> | 5.16 × 10 <sup>-2</sup> | 1.20 × 10 <sup>-2</sup> | 1.31 × 10 <sup>-1</sup> | 2.84 × 10 <sup>-2</sup>      | 2.28 × 10 <sup>-1</sup> | 2.03 × 10 <sup>-1</sup> | 5.20 × 10 <sup>1</sup>       | 4.05 × 10 <sup>-3</sup> | 3.29 × 10 <sup>-4</sup> | 6.53 × 10 <sup>-4</sup> | 7.59 × 10 <sup>-5</sup> | 1.66 × 10 <sup>-4</sup> | 1.80 × 10 <sup>-4</sup> | 8.66 × 10 <sup>-4</sup> | 1.29 × 10 <sup>-3</sup> | 1.97                         |
|        | S21    | 3.25                    | 1.28 × 10 <sup>-1</sup> | 8.80 × 10 <sup>-3</sup> | 1.24 × 10 <sup>-2</sup> | 5.36 × 10 <sup>-2</sup> | 1.68 × 10 <sup>-2&lt;/</sup> |                         |                         |                              |                         |                         |                         |                         |                         |                         |                         |                         |                              |

**Table S4.** Hazard Quotient (HQ) values of metals and nitrate through the oral and dermal pathways for those in the adult age category exposed to spring waters collected in October 2019 (A19), May 2020 (S20), November 2020 (A20), and Spring 2021 (S21).

| Spring | Season | Adult                   |                         |                         |                         |                         |                         |                         |                         |                              |                         |                         |                         |                         |                         |                         |                         |                         |                              |
|--------|--------|-------------------------|-------------------------|-------------------------|-------------------------|-------------------------|-------------------------|-------------------------|-------------------------|------------------------------|-------------------------|-------------------------|-------------------------|-------------------------|-------------------------|-------------------------|-------------------------|-------------------------|------------------------------|
|        |        | HQ oral                 |                         |                         |                         |                         |                         |                         |                         |                              | HQ dermal               |                         |                         |                         |                         |                         |                         |                         |                              |
|        |        | Fe                      | Al                      | Cr                      | Mn                      | Ni                      | Cu                      | Zn                      | Ba                      | NO <sub>3</sub> <sup>-</sup> | Fe                      | Al                      | Cr                      | Mn                      | Ni                      | Cu                      | Zn                      | Ba                      | NO <sub>3</sub> <sup>-</sup> |
| GWR1   | A19    | 9.07 × 10 <sup>-4</sup> | 1.40 × 10 <sup>-4</sup> | 1.16 × 10 <sup>-2</sup> | 7.86 × 10 <sup>-4</sup> | 4.24 × 10 <sup>-3</sup> | 8.25 × 10 <sup>-4</sup> | 2.10 × 10 <sup>-4</sup> | 1.18 × 10 <sup>-3</sup> | 5.30 × 10 <sup>-2</sup>      | 2.06 × 10 <sup>-5</sup> | 3.19 × 10 <sup>-6</sup> | 2.12 × 10 <sup>-3</sup> | 8.94 × 10 <sup>-5</sup> | 9.65 × 10 <sup>-5</sup> | 1.88 × 10 <sup>-5</sup> | 2.86 × 10 <sup>-6</sup> | 7.66 × 10 <sup>-5</sup> | 2.50 × 10 <sup>-3</sup>      |
|        | S20    | 8.53 × 10 <sup>-3</sup> | 2.28 × 10 <sup>-4</sup> | 1.67 × 10 <sup>-2</sup> | 1.10 × 10 <sup>-3</sup> | 2.44 × 10 <sup>-3</sup> | 3.30 × 10 <sup>-4</sup> | 1.57 × 10 <sup>-4</sup> | 1.05 × 10 <sup>-3</sup> | 3.59 × 10 <sup>-2</sup>      | 1.94 × 10 <sup>-4</sup> | 5.18 × 10 <sup>-6</sup> | 3.03 × 10 <sup>-3</sup> | 1.25 × 10 <sup>-4</sup> | 5.54 × 10 <sup>-5</sup> | 7.51 × 10 <sup>-6</sup> | 2.15 × 10 <sup>-6</sup> | 6.84 × 10 <sup>-5</sup> | 1.69 × 10 <sup>-3</sup>      |
|        | A20    | 2.73 × 10 <sup>-3</sup> | 5.06 × 10 <sup>-4</sup> | 2.71 × 10 <sup>-2</sup> | 2.24 × 10 <sup>-3</sup> | 2.03 × 10 <sup>-3</sup> | 4.48 × 10 <sup>-4</sup> | 8.26 × 10 <sup>-4</sup> | 1.65 × 10 <sup>-3</sup> | 3.79 × 10 <sup>-2</sup>      | 6.22 × 10 <sup>-5</sup> | 1.15 × 10 <sup>-5</sup> | 4.94 × 10 <sup>-3</sup> | 2.55 × 10 <sup>-4</sup> | 4.61 × 10 <sup>-5</sup> | 1.02 × 10 <sup>-5</sup> | 1.13 × 10 <sup>-5</sup> | 1.07 × 10 <sup>-4</sup> | 1.78 × 10 <sup>-3</sup>      |
|        | S21    | 6.64 × 10 <sup>-3</sup> | 1.00 × 10 <sup>-3</sup> | 1.80 × 10 <sup>-2</sup> | 2.75 × 10 <sup>-3</sup> | 3.90 × 10 <sup>-3</sup> | 2.99 × 10 <sup>-4</sup> | 1.99 × 10 <sup>-4</sup> | 2.01 × 10 <sup>-3</sup> | 4.05 × 10 <sup>-2</sup>      | 1.51 × 10 <sup>-4</sup> | 2.28 × 10 <sup>-5</sup> | 3.28 × 10 <sup>-3</sup> | 3.13 × 10 <sup>-4</sup> | 8.87 × 10 <sup>-5</sup> | 6.79 × 10 <sup>-6</sup> | 2.72 × 10 <sup>-6</sup> | 1.31 × 10 <sup>-4</sup> | 1.90 × 10 <sup>-3</sup>      |
| GWR2   | A19    | 1.29 × 10 <sup>-3</sup> | 2.69 × 10 <sup>-4</sup> | 2.10 × 10 <sup>-3</sup> | 6.55 × 10 <sup>-4</sup> | 4.70 × 10 <sup>-3</sup> | 2.75 × 10 <sup>-4</sup> | 8.38 × 10 <sup>-5</sup> | 2.31 × 10 <sup>-3</sup> | 1.07 × 10 <sup>-1</sup>      | 2.94 × 10 <sup>-5</sup> | 6.12 × 10 <sup>-6</sup> | 3.81 × 10 <sup>-4</sup> | 7.45 × 10 <sup>-5</sup> | 1.07 × 10 <sup>-4</sup> | 6.26 × 10 <sup>-6</sup> | 1.14 × 10 <sup>-6</sup> | 1.50 × 10 <sup>-4</sup> | 5.03 × 10 <sup>-3</sup>      |
|        | S20    | 4.53 × 10 <sup>-3</sup> | 2.89 × 10 <sup>-5</sup> | 3.14 × 10 <sup>-3</sup> | 4.98 × 10 <sup>-4</sup> | 1.96 × 10 <sup>-3</sup> | 1.96 × 10 <sup>-4</sup> | 1.15 × 10 <sup>-4</sup> | 1.90 × 10 <sup>-3</sup> | 1.35 × 10 <sup>-1</sup>      | 1.03 × 10 <sup>-4</sup> | 6.58 × 10 <sup>-7</sup> | 5.72 × 10 <sup>-4</sup> | 5.66 × 10 <sup>-5</sup> | 4.47 × 10 <sup>-5</sup> | 4.47 × 10 <sup>-6</sup> | 1.57 × 10 <sup>-6</sup> | 1.24 × 10 <sup>-4</sup> | 6.36 × 10 <sup>-3</sup>      |
|        | A20    | 7.27 × 10 <sup>-4</sup> | 1.79 × 10 <sup>-4</sup> | 4.09 × 10 <sup>-3</sup> | 2.38 × 10 <sup>-3</sup> | 4.18 × 10 <sup>-3</sup> | 3.85 × 10 <sup>-4</sup> | 7.12 × 10 <sup>-5</sup> | 3.63 × 10 <sup>-3</sup> | 1.41 × 10 <sup>-1</sup>      | 1.65 × 10 <sup>-5</sup> | 4.08 × 10 <sup>-6</sup> | 7.44 × 10 <sup>-4</sup> | 2.71 × 10 <sup>-4</sup> | 9.51 × 10 <sup>-5</sup> | 8.76 × 10 <sup>-6</sup> | 9.72 × 10 <sup>-7</sup> | 2.36 × 10 <sup>-4</sup> | 6.66 × 10 <sup>-3</sup>      |
|        | S21    | 1.07 × 10 <sup>-3</sup> | 2.80 × 10 <sup>-4</sup> | 3.66 × 10 <sup>-2</sup> | 5.24 × 10 <sup>-4</sup> | 5.20 × 10 <sup>-3</sup> | 3.14 × 10 <sup>-4</sup> | 1.57 × 10 <sup>-4</sup> | 2.91 × 10 <sup>-3</sup> | 1.11 × 10 <sup>-1</sup>      | 2.44 × 10 <sup>-5</sup> | 6.36 × 10 <sup>-6</sup> | 6.65 × 10 <sup>-3</sup> | 5.96 × 10 <sup>-5</sup> | 1.18 × 10 <sup>-4</sup> | 7.15 × 10 <sup>-6</sup> | 2.15 × 10 <sup>-6</sup> | 1.89 × 10 <sup>-4</sup> | 5.21 × 10 <sup>-3</sup>      |
| GWR3   | A19    | 1.21 × 10 <sup>-3</sup> | 2.50 × 10 <sup>-4</sup> | 3.14 × 10 <sup>-3</sup> | 5.24 × 10 <sup>-4</sup> | 1.85 × 10 <sup>-3</sup> | 2.36 × 10 <sup>-4</sup> | 7.33 × 10 <sup>-5</sup> | 8.33 × 10 <sup>-4</sup> | 5.01 × 10 <sup>-2</sup>      | 2.75 × 10 <sup>-5</sup> | 5.68 × 10 <sup>-6</sup> | 5.72 × 10 <sup>-4</sup> | 5.96 × 10 <sup>-5</sup> | 4.22 × 10 <sup>-5</sup> | 5.36 × 10 <sup>-6</sup> | 1.00 × 10 <sup>-6</sup> | 5.41 × 10 <sup>-5</sup> | 2.36 × 10 <sup>-3</sup>      |
|        | S20    | 5.16 × 10 <sup>-3</sup> | 3.71 × 10 <sup>-5</sup> | 2.30 × 10 <sup>-3</sup> | 3.93 × 10 <sup>-4</sup> | 2.37 × 10 <sup>-3</sup> | 2.20 × 10 <sup>-4</sup> | 8.38 × 10 <sup>-5</sup> | 1.89 × 10 <sup>-3</sup> | 5.89 × 10 <sup>-2</sup>      | 1.17 × 10 <sup>-4</sup> | 8.44 × 10 <sup>-7</sup> | 4.20 × 10 <sup>-4</sup> | 4.47 × 10 <sup>-5</sup> | 5.40 × 10 <sup>-5</sup> | 5.01 × 10 <sup>-6</sup> | 1.14 × 10 <sup>-6</sup> | 1.23 × 10 <sup>-4</sup> | 2.77 × 10 <sup>-3</sup>      |
|        | A20    | 5.97 × 10 <sup>-4</sup> | 1.10 × 10 <sup>-4</sup> | 2.72 × 10 <sup>-3</sup> | 1.72 × 10 <sup>-3</sup> | 2.56 × 10 <sup>-3</sup> | 2.75 × 10 <sup>-4</sup> | 6.29 × 10 <sup>-5</sup> | 1.18 × 10 <sup>-3</sup> | 5.07 × 10 <sup>-2</sup>      | 1.36 × 10 <sup>-5</sup> | 2.50 × 10 <sup>-6</sup> | 4.96 × 10 <sup>-4</sup> | 1.95 × 10 <sup>-4</sup> | 5.83 × 10 <sup>-5</sup> | 6.26 × 10 <sup>-6</sup> | 8.58 × 10 <sup>-7</sup> | 7.68 × 10 <sup>-5</sup> | 2.39 × 10 <sup>-3</sup>      |
|        | S21    | 1.54 × 10 <sup>-3</sup> | 4.71 × 10 <sup>-5</sup> | 5.28 × 10 <sup>-2</sup> | 3.93 × 10 <sup>-4</sup> | 7.65 × 10 <sup>-3</sup> | 2.51 × 10 <sup>-4</sup> | 1.68 × 10 <sup>-4</sup> | 2.56 × 10 <sup>-3</sup> | 5.56 × 10 <sup>-2</sup>      | 3.49 × 10 <sup>-5</sup> | 1.07 × 10 <sup>-6</sup> | 9.61 × 10 <sup>-3</sup> | 4.47 × 10 <sup>-5</sup> | 1.74 × 10 <sup>-4</sup> | 5.72 × 10 <sup>-6</sup> | 2.29 × 10 <sup>-6</sup> | 1.67 × 10 <sup>-4</sup> | 2.62 × 10 <sup>-3</sup>      |
| GWR5   | A19    | 6.20 × 10 <sup>-4</sup> | 6.41 × 10 <sup>-5</sup> | 2.10 × 10 <sup>-3</sup> | 3.93 × 10 <sup>-4</sup> | 5.12 × 10 <sup>-3</sup> | 2.20 × 10 <sup>-4</sup> | 9.43 × 10 <sup>-5</sup> | 8.33 × 10 <sup>-4</sup> | 4.69 × 10 <sup>-2</sup>      | 1.41 × 10 <sup>-5</sup> | 1.46 × 10 <sup>-6</sup> | 3.81 × 10 <sup>-4</sup> | 4.47 × 10 <sup>-5</sup> | 1.17 × 10 <sup>-4</sup> | 5.01 × 10 <sup>-6</sup> | 1.29 × 10 <sup>-6</sup> | 5.41 × 10 <sup>-5</sup> | 2.21 × 10 <sup>-3</sup>      |
|        | S20    | 7.05 × 10 <sup>-3</sup> | 2.33 × 10 <sup>-5</sup> | 2.93 × 10 <sup>-3</sup> | 4.71 × 10 <sup>-4</sup> | 3.57 × 10 <sup>-3</sup> | 2.83 × 10 <sup>-4</sup> | 1.05 × 10 <sup>-4</sup> | 1.00 × 10 <sup>-3</sup> | 3.83 × 10 <sup>-2</sup>      | 1.60 × 10 <sup>-4</sup> | 5.29 × 10 <sup>-7</sup> | 5.34 × 10 <sup>-4</sup> | 5.36 × 10 <sup>-5</sup> | 8.12 × 10 <sup>-5</sup> | 6.44 × 10 <sup>-6</sup> | 1.43 × 10 <sup>-6</sup> | 6.51 × 10 <sup>-5</sup> | 1.80 × 10 <sup>-3</sup>      |
|        | A20    | 8.67 × 10 <sup>-4</sup> | 2.51 × 10 <sup>-5</sup> | 5.97 × 10 <sup>-3</sup> | 1.90 × 10 <sup>-3</sup> | 5.09 × 10 <sup>-3</sup> | 1.96 × 10 <sup>-4</sup> | 8.38 × 10 <sup>-5</sup> | 1.13 × 10 <sup>-3</sup> | 4.60 × 10 <sup>-2</sup>      | 1.97 × 10 <sup>-5</sup> | 5.72 × 10 <sup>-7</sup> | 1.09 × 10 <sup>-3</sup> | 2.16 × 10 <sup>-4</sup> | 1.16 × 10 <sup>-4</sup> | 4.47 × 10 <sup>-6</sup> | 1.14 × 10 <sup>-6</sup> | 7.37 × 10 <sup>-5</sup> | 2.16 × 10 <sup>-3</sup>      |
|        | S21    | 1.46 × 10 <sup>-3</sup> | 9.74 × 10 <sup>-5</sup> | 3.99 × 10 <sup>-2</sup> | 2.62 × 10 <sup>-4</sup> | 7.89 × 10 <sup>-3</sup> | 2.67 × 10 <sup>-4</sup> | 1.15 × 10 <sup>-4</sup> | 1.18 × 10 <sup>-3</sup> | 3.79 × 10 <sup>-2</sup>      | 3.33 × 10 <sup>-5</sup> | 2.22 × 10 <sup>-6</sup> | 7.27 × 10 <sup>-3</sup> | 2.98 × 10 <sup>-5</sup> | 1.79 × 10 <sup>-4</sup> | 6.08 × 10 <sup>-6</sup> | 1.57 × 10 <sup>-6</sup> | 7.66 × 10 <sup>-5</sup> | 1.78 × 10 <sup>-3</sup>      |
| GWR6   | A19    | 1.09 × 10 <sup>-3</sup> | 2.31 × 10 <sup>-4</sup> | 3.14 × 10 <sup>-3</sup> | 5.89 × 10 <sup>-4</sup> | 7.06 × 10 <sup>-3</sup> | 2.67 × 10 <sup>-4</sup> | 9.43 × 10 <sup>-5</sup> | 2.14 × 10 <sup>-3</sup> | 1.16 × 10 <sup>-1</sup>      | 2.48 × 10 <sup>-5</sup> | 5.25 × 10 <sup>-6</sup> | 5.72 × 10 <sup>-4</sup> | 6.70 × 10 <sup>-5</sup> | 1.61 × 10 <sup>-4</sup> | 6.08 × 10 <sup>-6</sup> | 1.29 × 10 <sup>-6</sup> | 1.39 × 10 <sup>-4</sup> | 5.45 × 10 <sup>-3</sup>      |
|        | S20    | 8.58 × 10 <sup>-3</sup> | 5.63 × 10 <sup>-5</sup> | 2.10 × 10 <sup>-3</sup> | 4.19 × 10 <sup>-4</sup> | 3.82 × 10 <sup>-3</sup> | 3.61 × 10 <sup>-4</sup> | 7.33 × 10 <sup>-5</sup> | 2.26 × 10 <sup>-3</sup> | 9.35 × 10 <sup>-2</sup>      | 1.95 × 10 <sup>-4</sup> | 1.28 × 10 <sup>-6</sup> | 3.81 × 10 <sup>-4</sup> | 4.77 × 10 <sup>-5</sup> | 8.69 × 10 <sup>-5</sup> | 8.22 × 10 <sup>-6</sup> | 1.00 × 10 <sup>-6</sup> | 1.47 × 10 <sup>-4</sup> | 4.40 × 10 <sup>-3</sup>      |
|        | A20    | 1.01 × 10 <sup>-3</sup> | 8.49 × 10 <sup>-5</sup> | 5.03 × 10 <sup>-3</sup> | 5.40 × 10 <sup>-3</sup> | 7.35 × 10 <sup>-3</sup> | 5.03 × 10 <sup>-4</sup> | 1.01 × 10 <sup>-4</sup> | 3.33 × 10 <sup>-3</sup> | 6.88 × 10 <sup>-2</sup>      | 2.31 × 10 <sup>-5</sup> | 1.93 × 10 <sup>-6</sup> | 9.15 × 10 <sup>-4</sup> | 6.14 × 10 <sup>-4</sup> | 1.67 × 10 <sup>-4</sup> | 1.14 × 10 <sup>-5</sup> | 1.37 × 10 <sup>-6</sup> | 2.17 × 10 <sup>-4</sup> | 3.24 × 10 <sup>-3</sup>      |
|        | S21    | 1.45 × 10 <sup>-3</sup> | 1.23 × 10 <sup>-4</sup> | 6.65 × 10 <sup>-2</sup> | 2.62 × 10 <sup>-4</sup> | 1.23 × 10 <sup>-2</sup> | 3.93 × 10 <sup>-4</sup> | 1.05 × 10 <sup>-4</sup> | 3.94 × 10 <sup>-3</sup> | 9.23 × 10 <sup>-2</sup>      | 3.30 × 10 <sup>-5</sup> | 2.79 × 10 <sup>-6</sup> | 1.21 × 10 <sup>-2</sup> | 2.98 × 10 <sup>-5</sup> | 2.80 × 10 <sup>-4</sup> | 8.94 × 10 <sup>-6</sup> | 1.43 × 10 <sup>-6</sup> | 2.56 × 10 <sup>-4</sup> | 4.35 × 10 <sup>-3</sup>      |
| GWR7   | A19    | 1.02 × 10 <sup>-3</sup> | 1.91 × 10 <sup>-4</sup> | 1.05 × 10 <sup>-2</sup> | 2.88 × 10 <sup>-3</sup> | 6.46 × 10 <sup>-3</sup> | 4.09 × 10 <sup>-4</sup> | 8.38 × 10 <sup>-5</sup> | 7.07 × 10 <sup>-4</sup> | 1.71 × 10 <sup>-2</sup>      | 2.33 × 10 <sup>-5</sup> | 4.34 × 10 <sup>-6</sup> | 1.91 × 10 <sup>-3</sup> | 3.28 × 10 <sup>-4</sup> | 1.47 × 10 <sup>-4</sup> | 9.30 × 10 <sup>-6</sup> | 1.14 × 10 <sup>-6</sup> | 4.60 × 10 <sup>-5</sup> | 8.04 × 10 <sup>-4</sup>      |
|        | S20    | 8.40 × 10 <sup>-3</sup> | 3.08 × 10 <sup>-5</sup> | 1.57 × 10 <sup>-2</sup> | 2.03 × 10 <sup>-2</sup> | 4.24 × 10 <sup>-3</sup> | 1.08 × 10 <sup>-3</sup> | 1.15 × 10 <sup>-4</sup> | 1.07 × 10 <sup>-3</sup> | 5.11 × 10 <sup>-3</sup>      | 1.91 × 10 <sup>-4</sup> | 7.01 × 10 <sup>-7</sup> | 2.86 × 10 <sup>-3</sup> | 2.31 × 10 <sup>-3</sup> | 9.65 × 10 <sup>-5</sup> | 2.47 × 10 <sup>-5</sup> | 1.57 × 10 <sup>-6</sup> | 6.96 × 10 <sup>-5</sup> | 2.40 × 10 <sup>-4</sup>      |
|        | A20    | 2.17 × 10 <sup>-4</sup> | 1.54 × 10 <sup>-5</sup> | 1.98 × 10 <sup>-2</sup> | 2.19 × 10 <sup>-3</sup> | 7.01 × 10 <sup>-3</sup> | 3.38 × 10 <sup>-4</sup> | 2.36 × 10 <sup>-4</sup> | 1.79 × 10 <sup>-3</sup> | 1.71 × 10 <sup>-1</sup>      | 4.93 × 10 <sup>-6</sup> | 3.50 × 10 <sup>-7</sup> | 3.60 × 10 <sup>-3</sup> | 2.49 × 10 <sup>-4</sup> | 1.59 × 10 <sup>-4</sup> | 7.69 × 10 <sup>-6</sup> | 3.22 × 10 <sup>-6</sup> | 1.16 × 10 <sup>-4</sup> | 8.04 × 10 <sup>-3</sup>      |
|        | S21    | 1.36 × 10 <sup>-3</sup> | 2.83 × 10 <sup>-5</sup> | 5.75 × 10 <sup>-2</sup> | 2.17 × 10 <sup>-2</sup> | 1.01 × 10 <sup>-2</sup> | 4.87 × 10 <sup>-4</sup> | 1.47 × 10 <sup>-4</sup> | 1.93 × 10 <sup>-3</sup> | 2.79 × 10 <sup>-2</sup>      | 3.11 × 10 <sup>-5</sup> | 6.44 × 10 <sup>-7</sup> | 1.05 × 10 <sup>-2</sup> | 2.47 × 10 <sup>-3</sup> | 2.29 × 10 <sup>-4</sup> | 1.11 × 10 <sup>-5</sup> | 2.00 × 10 <sup>-6</sup> | 1.26 × 10 <sup>-4</sup> | 1.31 × 10 <sup>-3</sup>      |
| GWR8   | A19    | 9.07 × 10 <sup>-4</sup> | 6.38 × 10 <sup>-5</sup> | 2.10 × 10 <sup>-3</sup> | 5.24 × 10 <sup>-4</sup> | 7.35 × 10 <sup>-3</sup> | 2.20 × 10 <sup>-4</sup> | 7.33 × 10 <sup>-5</sup> | 1.15 × 10 <sup>-3</sup> | 1.18 × 10 <sup>-1</sup>      | 2.06 × 10 <sup>-5</sup> | 1.45 × 10 <sup>-6</sup> | 3.81 × 10 <sup>-4</sup> | 5.96 × 10 <sup>-5</sup> | 1.67 × 10 <sup>-4</sup> | 5.01 × 10 <sup>-6</sup> | 1.00 × 10 <sup>-6</sup> | 7.46 × 10 <sup>-5</sup> | 5.55 × 10 <sup>-3</sup>      |
|        | S20    | 9.83 × 10 <sup>-3</sup> | 3.17 × 10 <sup>-5</sup> | 4.19 × 10 <sup>-3</sup> | 7.86 × 10 <sup>-4</sup> | 3.91 × 10 <sup>-3</sup> | 2.59 × 10 <sup>-4</sup> | 9.43 × 10 <sup>-5</sup> | 1.87 × 10 <sup>-3</sup> | 1.11 × 10 <sup>-1</sup>      | 2.24 × 10 <sup>-4</sup> | 7.22 × 10 <sup>-7</sup> | 7.63 × 10 <sup>-4</sup> | 8.94 × 10 <sup>-5</sup> | 8.90 × 10 <sup>-5</sup> | 5.90 × 10 <sup>-6</sup> | 1.29 × 10 <sup>-6</sup> | 1.22 × 10 <sup>-4</sup> | 5.22 × 10 <sup>-3</sup>      |
|        | A20    | 9.97 × 10 <sup>-4</sup> | 1.89 × 10 <sup>-5</sup> | 4.50 × 10 <sup>-3</sup> | 2.32 × 10 <sup>-3</sup> | 6.84 × 10 <sup>-3</sup> | 2.36 × 10 <sup>-4</sup> | 1.02 × 10 <sup>-4</sup> | 1.63 × 10 <sup>-3</sup> | 9.43 × 10 <sup>-2</sup>      | 2.27 × 10 <sup>-5</sup> | 4.29 × 10 <sup>-7</sup> | 8.20 × 10 <sup>-4</sup> | 2.64 × 10 <sup>-4</sup> | 1.56 × 10 <sup>-4</sup> | 5.36 × 10 <sup>-6</sup> | 1.39 × 10 <sup>-6</sup> | 1.06 × 10 <sup>-4</sup> | 4.44 × 10 <sup>-3</sup>      |
|        | S21    | 1.93 × 10 <sup>-3</sup> | 3.14 × 10 <sup>-5</sup> | 6.55 × 10 <sup>-2</sup> | 1.31 × 10 <sup>-4</sup> | 1.23 × 10 <sup>-2</sup> | 2.28 × 10 <sup>-4</sup> | 1.05 × 10 <sup>-4</sup> | 2.03 × 10 <sup>-3</sup> | 7.15 × 10 <sup>-2</sup>      | 4.38 × 10 <sup>-5</sup> | 7.15 × 10 <sup>-7</sup> | 1.19 × 10 <sup>-2</sup> | 1.49 × 10 <sup>-5</sup> | 2.80 × 10 <sup>-4</sup> | 5.18 × 10 <sup>-6</sup> | 1.43 × 10 <sup>-6</sup> | 1.32 × 10 <sup>-4</sup> | 3.37 × 10 <sup>-3</sup>      |
| GWR9   | A19    | 1.48 × 10 <sup>-4</sup> | 2.51 × 10 <sup>-5</sup> | 2.38 × 10 <sup>-2</sup> | 1.57 × 10 <sup>-3</sup> | 3.54 × 10 <sup>-3</sup> | 2.20 × 10 <sup>-4</sup> | 1.05 × 10 <sup>-4</sup> | 4.56 × 10 <sup>-4</sup> | 2.16 × 10 <sup>-1</sup>      | 3.37 × 10 <sup>-6</sup> | 5.72 × 10 <sup>-7</sup> | 4.33 × 10 <sup>-3</sup> | 1.79 × 10 <sup>-4</sup> | 8.04 × 10 <sup>-5</sup> | 5.01 × 10 <sup>-6</sup> | 1.43 × 10 <sup>-6</sup> | 2.96 × 10 <sup>-5</sup> | 1.02 × 10 <sup>-2</sup>      |
|        | S20    | 7.41 × 10 <sup>-3</sup> | 7.17 × 10 <sup>-5</sup> | 1.50 × 10 <sup>-2</sup> | 6.55 × 10 <sup>-4</sup> | 3.25 × 10 <sup>-3</sup> | 3.06 × 10 <sup>-4</sup> | 2.41 × 10 <sup>-4</sup> | 7.98 × 10 <sup>-4</sup> | 1.88 × 10 <sup>-1</sup>      | 1.69 × 10 <sup>-4</sup> | 1.63 × 10 <sup>-6</sup> | 2.73 × 10 <sup>-3</sup> | 7.45 × 10 <sup>-5</sup> | 7.40 × 10 <sup>-5</sup> | 6.97 × 10 <sup>-6</sup> | 3.29 × 10 <sup>-6</sup> | 5.19 × 10 <sup>-5</sup> | 8.83 × 10 <sup>-3</sup>      |
|        | A20    | 7.18 × 10 <sup>-4</sup> | 4.                      |                         |                         |                         |                         |                         |                         |                              |                         |                         |                         |                         |                         |                         |                         |                         |                              |

**Table S5.** Hazard Quotient (HQ) of metals and nitrate through the oral and dermal pathways for those in the children age category exposed to spring waters collected in October 2019 (A19), May 2020 (S20), November 2020 (A20), and Spring 2021 (S21).

| Spring | Season | Children                |                         |                         |                         |                         |                         |                         |                         |                              |                         |                         |                         |                         |                         |                         |                         |                         |                              |
|--------|--------|-------------------------|-------------------------|-------------------------|-------------------------|-------------------------|-------------------------|-------------------------|-------------------------|------------------------------|-------------------------|-------------------------|-------------------------|-------------------------|-------------------------|-------------------------|-------------------------|-------------------------|------------------------------|
|        |        | HQ <sub>oral</sub>      |                         |                         |                         |                         |                         |                         |                         |                              | HQ <sub>dermal</sub>    |                         |                         |                         |                         |                         |                         |                         |                              |
|        |        | Fe                      | Al                      | Cr                      | Mn                      | Ni                      | Cu                      | Zn                      | Ba                      | NO <sub>3</sub> <sup>-</sup> | Fe                      | Al                      | Cr                      | Mn                      | Ni                      | Cu                      | Zn                      | Ba                      | NO <sub>3</sub> <sup>-</sup> |
| GWR1   | A19    | 1.15 x 10 <sup>-3</sup> | 1.78 x 10 <sup>-4</sup> | 1.48 x 10 <sup>-2</sup> | 1.00 x 10 <sup>-3</sup> | 5.40 x 10 <sup>-3</sup> | 1.05 x 10 <sup>-3</sup> | 2.67 x 10 <sup>-4</sup> | 1.50 x 10 <sup>-3</sup> | 6.75 x 10 <sup>-2</sup>      | 3.65 x 10 <sup>-5</sup> | 5.65 x 10 <sup>-6</sup> | 7.49 x 10 <sup>-3</sup> | 1.58 x 10 <sup>-4</sup> | 1.71 x 10 <sup>-4</sup> | 3.32 x 10 <sup>-5</sup> | 5.06 x 10 <sup>-6</sup> | 1.36 x 10 <sup>-4</sup> | 2.56 x 10 <sup>-3</sup>      |
|        | S20    | 1.09 x 10 <sup>-2</sup> | 2.90 x 10 <sup>-4</sup> | 2.12 x 10 <sup>-2</sup> | 1.40 x 10 <sup>-3</sup> | 3.10 x 10 <sup>-3</sup> | 4.20 x 10 <sup>-4</sup> | 2.00 x 10 <sup>-4</sup> | 1.34 x 10 <sup>-3</sup> | 4.58 x 10 <sup>-2</sup>      | 3.44 x 10 <sup>-4</sup> | 9.18 x 10 <sup>-6</sup> | 1.07 x 10 <sup>-2</sup> | 2.22 x 10 <sup>-4</sup> | 9.81 x 10 <sup>-5</sup> | 1.33 x 10 <sup>-5</sup> | 3.80 x 10 <sup>-6</sup> | 1.21 x 10 <sup>-4</sup> | 1.74 x 10 <sup>-3</sup>      |
|        | A20    | 3.48 x 10 <sup>-3</sup> | 6.44 x 10 <sup>-4</sup> | 3.45 x 10 <sup>-2</sup> | 2.85 x 10 <sup>-3</sup> | 2.58 x 10 <sup>-3</sup> | 5.70 x 10 <sup>-4</sup> | 1.05 x 10 <sup>-3</sup> | 2.10 x 10 <sup>-3</sup> | 4.83 x 10 <sup>-2</sup>      | 1.10 x 10 <sup>-4</sup> | 2.04 x 10 <sup>-5</sup> | 1.75 x 10 <sup>-2</sup> | 4.51 x 10 <sup>-4</sup> | 8.16 x 10 <sup>-5</sup> | 1.80 x 10 <sup>-5</sup> | 1.99 x 10 <sup>-5</sup> | 1.90 x 10 <sup>-4</sup> | 1.83 x 10 <sup>-3</sup>      |
|        | S21    | 8.46 x 10 <sup>-3</sup> | 1.28 x 10 <sup>-3</sup> | 2.29 x 10 <sup>-2</sup> | 3.50 x 10 <sup>-3</sup> | 4.96 x 10 <sup>-3</sup> | 3.80 x 10 <sup>-4</sup> | 2.53 x 10 <sup>-4</sup> | 2.56 x 10 <sup>-3</sup> | 5.15 x 10 <sup>-2</sup>      | 2.68 x 10 <sup>-4</sup> | 4.04 x 10 <sup>-5</sup> | 1.16 x 10 <sup>-2</sup> | 5.54 x 10 <sup>-4</sup> | 1.57 x 10 <sup>-4</sup> | 1.20 x 10 <sup>-5</sup> | 4.81 x 10 <sup>-6</sup> | 2.31 x 10 <sup>-4</sup> | 1.96 x 10 <sup>-3</sup>      |
| GWR2   | A19    | 1.65 x 10 <sup>-3</sup> | 3.42 x 10 <sup>-4</sup> | 2.67 x 10 <sup>-3</sup> | 8.33 x 10 <sup>-4</sup> | 5.98 x 10 <sup>-3</sup> | 3.50 x 10 <sup>-4</sup> | 1.07 x 10 <sup>-4</sup> | 2.94 x 10 <sup>-3</sup> | 1.36 x 10 <sup>-1</sup>      | 5.21 x 10 <sup>-5</sup> | 1.08 x 10 <sup>-5</sup> | 1.35 x 10 <sup>-3</sup> | 1.32 x 10 <sup>-4</sup> | 1.89 x 10 <sup>-4</sup> | 1.11 x 10 <sup>-5</sup> | 2.03 x 10 <sup>-6</sup> | 2.66 x 10 <sup>-4</sup> | 5.16 x 10 <sup>-3</sup>      |
|        | S20    | 5.77 x 10 <sup>-3</sup> | 3.68 x 10 <sup>-5</sup> | 4.00 x 10 <sup>-3</sup> | 6.33 x 10 <sup>-4</sup> | 2.50 x 10 <sup>-3</sup> | 2.50 x 10 <sup>-4</sup> | 1.47 x 10 <sup>-4</sup> | 2.42 x 10 <sup>-3</sup> | 1.72 x 10 <sup>-1</sup>      | 1.83 x 10 <sup>-4</sup> | 1.16 x 10 <sup>-6</sup> | 2.03 x 10 <sup>-3</sup> | 1.00 x 10 <sup>-4</sup> | 7.91 x 10 <sup>-5</sup> | 7.91 x 10 <sup>-6</sup> | 2.78 x 10 <sup>-6</sup> | 2.19 x 10 <sup>-4</sup> | 6.53 x 10 <sup>-3</sup>      |
|        | A20    | 9.26 x 10 <sup>-4</sup> | 2.28 x 10 <sup>-4</sup> | 5.20 x 10 <sup>-3</sup> | 3.03 x 10 <sup>-3</sup> | 5.32 x 10 <sup>-3</sup> | 4.90 x 10 <sup>-4</sup> | 9.07 x 10 <sup>-5</sup> | 4.62 x 10 <sup>-3</sup> | 1.80 x 10 <sup>-1</sup>      | 2.93 x 10 <sup>-5</sup> | 7.21 x 10 <sup>-6</sup> | 2.63 x 10 <sup>-3</sup> | 4.80 x 10 <sup>-4</sup> | 1.68 x 10 <sup>-4</sup> | 1.55 x 10 <sup>-5</sup> | 1.72 x 10 <sup>-6</sup> | 4.18 x 10 <sup>-4</sup> | 6.84 x 10 <sup>-3</sup>      |
|        | S21    | 1.37 x 10 <sup>-3</sup> | 3.56 x 10 <sup>-4</sup> | 4.65 x 10 <sup>-2</sup> | 6.67 x 10 <sup>-4</sup> | 6.62 x 10 <sup>-3</sup> | 4.00 x 10 <sup>-4</sup> | 2.00 x 10 <sup>-4</sup> | 3.70 x 10 <sup>-3</sup> | 1.41 x 10 <sup>-1</sup>      | 4.32 x 10 <sup>-5</sup> | 1.13 x 10 <sup>-5</sup> | 2.36 x 10 <sup>-2</sup> | 1.05 x 10 <sup>-4</sup> | 2.09 x 10 <sup>-4</sup> | 1.27 x 10 <sup>-5</sup> | 3.80 x 10 <sup>-6</sup> | 3.35 x 10 <sup>-4</sup> | 5.34 x 10 <sup>-3</sup>      |
| GWR3   | A19    | 1.54 x 10 <sup>-3</sup> | 3.18 x 10 <sup>-4</sup> | 4.00 x 10 <sup>-3</sup> | 6.67 x 10 <sup>-4</sup> | 2.36 x 10 <sup>-3</sup> | 3.00 x 10 <sup>-4</sup> | 9.33 x 10 <sup>-5</sup> | 1.06 x 10 <sup>-3</sup> | 6.38 x 10 <sup>-2</sup>      | 4.86 x 10 <sup>-5</sup> | 1.01 x 10 <sup>-5</sup> | 2.03 x 10 <sup>-3</sup> | 1.05 x 10 <sup>-4</sup> | 7.47 x 10 <sup>-5</sup> | 9.49 x 10 <sup>-6</sup> | 1.77 x 10 <sup>-6</sup> | 9.58 x 10 <sup>-5</sup> | 2.42 x 10 <sup>-3</sup>      |
|        | S20    | 6.57 x 10 <sup>-3</sup> | 4.72 x 10 <sup>-5</sup> | 2.93 x 10 <sup>-3</sup> | 5.00 x 10 <sup>-4</sup> | 3.02 x 10 <sup>-3</sup> | 2.80 x 10 <sup>-4</sup> | 1.07 x 10 <sup>-4</sup> | 2.40 x 10 <sup>-3</sup> | 7.50 x 10 <sup>-2</sup>      | 2.08 x 10 <sup>-4</sup> | 1.49 x 10 <sup>-6</sup> | 1.49 x 10 <sup>-3</sup> | 7.91 x 10 <sup>-5</sup> | 9.56 x 10 <sup>-5</sup> | 8.86 x 10 <sup>-6</sup> | 2.03 x 10 <sup>-6</sup> | 2.17 x 10 <sup>-4</sup> | 2.85 x 10 <sup>-3</sup>      |
|        | A20    | 7.60 x 10 <sup>-4</sup> | 1.40 x 10 <sup>-4</sup> | 3.47 x 10 <sup>-3</sup> | 2.18 x 10 <sup>-3</sup> | 3.26 x 10 <sup>-3</sup> | 3.50 x 10 <sup>-4</sup> | 8.00 x 10 <sup>-5</sup> | 1.50 x 10 <sup>-3</sup> | 6.45 x 10 <sup>-2</sup>      | 2.40 x 10 <sup>-5</sup> | 4.43 x 10 <sup>-6</sup> | 1.76 x 10 <sup>-3</sup> | 3.45 x 10 <sup>-4</sup> | 1.03 x 10 <sup>-4</sup> | 1.11 x 10 <sup>-5</sup> | 1.52 x 10 <sup>-6</sup> | 1.36 x 10 <sup>-4</sup> | 2.45 x 10 <sup>-3</sup>      |
|        | S21    | 1.95 x 10 <sup>-3</sup> | 6.00 x 10 <sup>-5</sup> | 6.72 x 10 <sup>-2</sup> | 5.00 x 10 <sup>-4</sup> | 9.74 x 10 <sup>-3</sup> | 3.20 x 10 <sup>-4</sup> | 2.13 x 10 <sup>-4</sup> | 3.26 x 10 <sup>-3</sup> | 7.08 x 10 <sup>-2</sup>      | 6.18 x 10 <sup>-5</sup> | 1.90 x 10 <sup>-6</sup> | 3.40 x 10 <sup>-2</sup> | 7.91 x 10 <sup>-5</sup> | 3.08 x 10 <sup>-4</sup> | 1.01 x 10 <sup>-5</sup> | 4.05 x 10 <sup>-6</sup> | 2.95 x 10 <sup>-4</sup> | 2.69 x 10 <sup>-3</sup>      |
| GWR5   | A19    | 7.89 x 10 <sup>-4</sup> | 8.16 x 10 <sup>-5</sup> | 2.67 x 10 <sup>-3</sup> | 5.00 x 10 <sup>-4</sup> | 6.52 x 10 <sup>-3</sup> | 2.80 x 10 <sup>-4</sup> | 1.20 x 10 <sup>-4</sup> | 1.06 x 10 <sup>-3</sup> | 5.98 x 10 <sup>-2</sup>      | 2.50 x 10 <sup>-5</sup> | 2.58 x 10 <sup>-6</sup> | 1.35 x 10 <sup>-3</sup> | 7.91 x 10 <sup>-5</sup> | 2.06 x 10 <sup>-4</sup> | 8.86 x 10 <sup>-6</sup> | 2.28 x 10 <sup>-6</sup> | 9.58 x 10 <sup>-5</sup> | 2.27 x 10 <sup>-3</sup>      |
|        | S20    | 8.97 x 10 <sup>-3</sup> | 2.96 x 10 <sup>-5</sup> | 3.73 x 10 <sup>-3</sup> | 6.00 x 10 <sup>-4</sup> | 4.54 x 10 <sup>-3</sup> | 3.60 x 10 <sup>-4</sup> | 1.33 x 10 <sup>-4</sup> | 1.27 x 10 <sup>-3</sup> | 4.88 x 10 <sup>-2</sup>      | 2.84 x 10 <sup>-4</sup> | 9.37 x 10 <sup>-7</sup> | 1.89 x 10 <sup>-3</sup> | 9.49 x 10 <sup>-5</sup> | 1.44 x 10 <sup>-4</sup> | 1.14 x 10 <sup>-5</sup> | 2.53 x 10 <sup>-6</sup> | 1.15 x 10 <sup>-4</sup> | 1.85 x 10 <sup>-3</sup>      |
|        | A20    | 1.10 x 10 <sup>-3</sup> | 3.20 x 10 <sup>-5</sup> | 7.60 x 10 <sup>-3</sup> | 2.42 x 10 <sup>-3</sup> | 6.48 x 10 <sup>-3</sup> | 2.50 x 10 <sup>-4</sup> | 1.07 x 10 <sup>-4</sup> | 1.44 x 10 <sup>-3</sup> | 5.85 x 10 <sup>-2</sup>      | 3.49 x 10 <sup>-5</sup> | 1.01 x 10 <sup>-6</sup> | 3.85 x 10 <sup>-3</sup> | 3.82 x 10 <sup>-4</sup> | 2.05 x 10 <sup>-4</sup> | 7.91 x 10 <sup>-6</sup> | 2.03 x 10 <sup>-6</sup> | 1.30 x 10 <sup>-4</sup> | 2.22 x 10 <sup>-3</sup>      |
|        | S21    | 1.86 x 10 <sup>-3</sup> | 1.24 x 10 <sup>-4</sup> | 5.08 x 10 <sup>-2</sup> | 3.33 x 10 <sup>-4</sup> | 1.00 x 10 <sup>-2</sup> | 3.40 x 10 <sup>-4</sup> | 1.47 x 10 <sup>-4</sup> | 1.50 x 10 <sup>-3</sup> | 4.83 x 10 <sup>-2</sup>      | 5.89 x 10 <sup>-5</sup> | 3.92 x 10 <sup>-6</sup> | 2.57 x 10 <sup>-2</sup> | 5.27 x 10 <sup>-5</sup> | 3.18 x 10 <sup>-4</sup> | 1.08 x 10 <sup>-5</sup> | 2.78 x 10 <sup>-6</sup> | 1.36 x 10 <sup>-4</sup> | 1.83 x 10 <sup>-3</sup>      |
| GWR6   | A19    | 1.39 x 10 <sup>-3</sup> | 2.94 x 10 <sup>-4</sup> | 4.00 x 10 <sup>-3</sup> | 7.50 x 10 <sup>-4</sup> | 8.98 x 10 <sup>-3</sup> | 3.40 x 10 <sup>-4</sup> | 1.20 x 10 <sup>-4</sup> | 2.72 x 10 <sup>-3</sup> | 1.47 x 10 <sup>-1</sup>      | 4.39 x 10 <sup>-5</sup> | 9.29 x 10 <sup>-6</sup> | 2.03 x 10 <sup>-3</sup> | 1.19 x 10 <sup>-4</sup> | 2.84 x 10 <sup>-4</sup> | 1.08 x 10 <sup>-5</sup> | 2.28 x 10 <sup>-6</sup> | 2.46 x 10 <sup>-4</sup> | 5.59 x 10 <sup>-3</sup>      |
|        | S20    | 1.09 x 10 <sup>-2</sup> | 7.16 x 10 <sup>-5</sup> | 2.67 x 10 <sup>-3</sup> | 5.33 x 10 <sup>-4</sup> | 4.86 x 10 <sup>-3</sup> | 4.60 x 10 <sup>-4</sup> | 9.33 x 10 <sup>-5</sup> | 2.88 x 10 <sup>-3</sup> | 1.19 x 10 <sup>-1</sup>      | 3.45 x 10 <sup>-4</sup> | 2.27 x 10 <sup>-6</sup> | 1.35 x 10 <sup>-3</sup> | 8.44 x 10 <sup>-5</sup> | 1.54 x 10 <sup>-4</sup> | 1.46 x 10 <sup>-5</sup> | 1.77 x 10 <sup>-6</sup> | 2.60 x 10 <sup>-4</sup> | 4.52 x 10 <sup>-3</sup>      |
|        | A20    | 1.29 x 10 <sup>-3</sup> | 1.08 x 10 <sup>-4</sup> | 6.40 x 10 <sup>-3</sup> | 6.87 x 10 <sup>-3</sup> | 9.36 x 10 <sup>-3</sup> | 6.40 x 10 <sup>-4</sup> | 1.28 x 10 <sup>-4</sup> | 4.24 x 10 <sup>-3</sup> | 8.75 x 10 <sup>-2</sup>      | 4.09 x 10 <sup>-5</sup> | 3.42 x 10 <sup>-6</sup> | 3.24 x 10 <sup>-3</sup> | 1.09 x 10 <sup>-3</sup> | 2.96 x 10 <sup>-4</sup> | 2.03 x 10 <sup>-5</sup> | 2.43 x 10 <sup>-6</sup> | 3.83 x 10 <sup>-4</sup> | 3.32 x 10 <sup>-3</sup>      |
|        | S21    | 1.85 x 10 <sup>-3</sup> | 1.56 x 10 <sup>-4</sup> | 8.47 x 10 <sup>-2</sup> | 3.33 x 10 <sup>-4</sup> | 1.56 x 10 <sup>-2</sup> | 5.00 x 10 <sup>-4</sup> | 1.33 x 10 <sup>-4</sup> | 5.02 x 10 <sup>-3</sup> | 1.18 x 10 <sup>-1</sup>      | 5.84 x 10 <sup>-5</sup> | 4.94 x 10 <sup>-6</sup> | 4.29 x 10 <sup>-2</sup> | 5.27 x 10 <sup>-5</sup> | 4.95 x 10 <sup>-4</sup> | 1.58 x 10 <sup>-5</sup> | 2.53 x 10 <sup>-6</sup> | 4.54 x 10 <sup>-4</sup> | 4.46 x 10 <sup>-3</sup>      |
| GWR7   | A19    | 1.30 x 10 <sup>-3</sup> | 2.43 x 10 <sup>-4</sup> | 1.33 x 10 <sup>-2</sup> | 3.67 x 10 <sup>-3</sup> | 8.22 x 10 <sup>-3</sup> | 5.20 x 10 <sup>-4</sup> | 1.07 x 10 <sup>-4</sup> | 9.00 x 10 <sup>-4</sup> | 2.18 x 10 <sup>-2</sup>      | 4.12 x 10 <sup>-5</sup> | 7.68 x 10 <sup>-6</sup> | 6.75 x 10 <sup>-3</sup> | 5.80 x 10 <sup>-4</sup> | 2.60 x 10 <sup>-4</sup> | 1.65 x 10 <sup>-5</sup> | 2.03 x 10 <sup>-6</sup> | 8.14 x 10 <sup>-5</sup> | 8.26 x 10 <sup>-4</sup>      |
|        | S20    | 1.07 x 10 <sup>-2</sup> | 3.92 x 10 <sup>-5</sup> | 2.00 x 10 <sup>-2</sup> | 2.58 x 10 <sup>-2</sup> | 5.40 x 10 <sup>-3</sup> | 1.38 x 10 <sup>-3</sup> | 1.47 x 10 <sup>-4</sup> | 1.36 x 10 <sup>-3</sup> | 6.50 x 10 <sup>-3</sup>      | 3.38 x 10 <sup>-4</sup> | 1.24 x 10 <sup>-6</sup> | 1.01 x 10 <sup>-2</sup> | 4.09 x 10 <sup>-3</sup> | 1.71 x 10 <sup>-4</sup> | 4.37 x 10 <sup>-5</sup> | 2.78 x 10 <sup>-6</sup> | 1.23 x 10 <sup>-4</sup> | 2.47 x 10 <sup>-4</sup>      |
|        | A20    | 2.76 x 10 <sup>-4</sup> | 1.96 x 10 <sup>-5</sup> | 2.52 x 10 <sup>-2</sup> | 2.78 x 10 <sup>-3</sup> | 8.92 x 10 <sup>-3</sup> | 4.30 x 10 <sup>-4</sup> | 3.00 x 10 <sup>-4</sup> | 2.28 x 10 <sup>-3</sup> | 2.17 x 10 <sup>-1</sup>      | 8.73 x 10 <sup>-6</sup> | 6.20 x 10 <sup>-7</sup> | 1.28 x 10 <sup>-2</sup> | 4.40 x 10 <sup>-4</sup> | 2.82 x 10 <sup>-4</sup> | 1.36 x 10 <sup>-5</sup> | 5.70 x 10 <sup>-6</sup> | 2.06 x 10 <sup>-4</sup> | 8.25 x 10 <sup>-3</sup>      |
|        | S21    | 1.74 x 10 <sup>-3</sup> | 3.60 x 10 <sup>-5</sup> | 7.32 x 10 <sup>-2</sup> | 2.77 x 10 <sup>-2</sup> | 1.28 x 10 <sup>-2</sup> | 6.20 x 10 <sup>-4</sup> | 1.87 x 10 <sup>-4</sup> | 2.46 x 10 <sup>-3</sup> | 3.55 x 10 <sup>-2</sup>      | 5.50 x 10 <sup>-5</sup> | 1.14 x 10 <sup>-6</sup> | 3.71 x 10 <sup>-2</sup> | 4.38 x 10 <sup>-3</sup> | 4.06 x 10 <sup>-4</sup> | 1.96 x 10 <sup>-5</sup> | 3.54 x 10 <sup>-6</sup> | 2.22 x 10 <sup>-4</sup> | 1.35 x 10 <sup>-3</sup>      |
| GWR8   | A19    | 1.15 x 10 <sup>-3</sup> | 8.12 x 10 <sup>-5</sup> | 2.67 x 10 <sup>-3</sup> | 6.67 x 10 <sup>-4</sup> | 9.36 x 10 <sup>-3</sup> | 2.80 x 10 <sup>-4</sup> | 9.33 x 10 <sup>-5</sup> | 1.46 x 10 <sup>-3</sup> | 1.50 x 10 <sup>-1</sup>      | 3.65 x 10 <sup>-5</sup> | 2.57 x 10 <sup>-6</sup> | 1.35 x 10 <sup>-3</sup> | 1.05 x 10 <sup>-4</sup> | 2.96 x 10 <sup>-4</sup> | 8.86 x 10 <sup>-6</sup> | 1.77 x 10 <sup>-6</sup> | 1.32 x 10 <sup>-4</sup> | 5.70 x 10 <sup>-3</sup>      |
|        | S20    | 1.25 x 10 <sup>-2</sup> | 4.04 x 10 <sup>-5</sup> | 5.33 x 10 <sup>-3</sup> | 1.00 x 10 <sup>-3</sup> | 4.98 x 10 <sup>-3</sup> | 3.30 x 10 <sup>-4</sup> | 1.20 x 10 <sup>-4</sup> | 2.38 x 10 <sup>-3</sup> | 1.41 x 10 <sup>-1</sup>      | 3.96 x 10 <sup>-4</sup> | 1.28 x 10 <sup>-6</sup> | 2.70 x 10 <sup>-3</sup> | 1.58 x 10 <sup>-4</sup> | 1.58 x 10 <sup>-4</sup> | 1.04 x 10 <sup>-5</sup> | 2.28 x 10 <sup>-6</sup> | 2.15 x 10 <sup>-4</sup> | 5.36 x 10 <sup>-3</sup>      |
|        | A20    | 1.27 x 10 <sup>-3</sup> | 2.40 x 10 <sup>-5</sup> | 5.73 x 10 <sup>-3</sup> | 2.95 x 10 <sup>-3</sup> | 8.70 x 10 <sup>-3</sup> | 3.00 x 10 <sup>-4</sup> | 1.29 x 10 <sup>-4</sup> | 2.08 x 10 <sup>-3</sup> | 1.20 x 10 <sup>-1</sup>      | 4.01 x 10 <sup>-5</sup> | 7.59 x 10 <sup>-7</sup> | 2.90 x 10 <sup>-3</sup> | 4.67 x 10 <sup>-4</sup> | 2.75 x 10 <sup>-4</sup> | 9.49 x 10 <sup>-6</sup> | 2.46 x 10 <sup>-6</sup> | 1.88 x 10 <sup>-4</sup> | 4.56 x 10 <sup>-3</sup>      |
|        | S21    | 2.45 x 10 <sup>-3</sup> | 4.00 x 10 <sup>-5</sup> | 8.33 x 10 <sup>-2</sup> | 1.67 x 10 <sup>-4</sup> | 1.56 x 10 <sup>-2</sup> | 2.90 x 10 <sup>-4</sup> | 1.33 x 10 <sup>-4</sup> | 2.58 x 10 <sup>-3</sup> | 9.10 x 10 <sup>-2</sup>      | 7.76 x 10 <sup>-5</sup> | 1.27 x 10 <sup>-6</sup> | 4.22 x 10 <sup>-2</sup> | 2.64 x 10 <sup>-5</sup> | 4.95 x 10 <sup>-4</sup> | 9.18 x 10 <sup>-6</sup> | 2.53 x 10 <sup>-6</sup> | 2.33 x 10 <sup>-4</sup> | 3.46 x 10 <sup>-3</sup>      |
| GWR9   | A19    | 1.89 x 10 <sup>-4</sup> | 3.20 x 10 <sup>-5</sup> | 3.03 x 10 <sup>-2</sup> | 2.00 x 10 <sup>-3</sup> | 4.50 x 10 <sup>-3</sup> | 2.80 x 10 <sup>-4</sup> | 1.33 x 10 <sup>-4</sup> | 5.80 x 10 <sup>-4</sup> | 2.75 x 10 <sup>-1</sup>      | 5.97 x 10 <sup>-6</sup> | 1.01 x 10 <sup>-6</sup> | 1.53 x 10 <sup>-2</sup> | 3.16 x 10 <sup>-4</sup> | 1.42 x 10 <sup>-4</sup> | 8.86 x 10 <sup>-6</sup> | 2.53 x 10 <sup>-6</sup> | 5.24 x 10 <sup>-5</sup> | 1.04 x 10 <sup>-2</sup>      |
|        | S20    | 9.43 x 10 <sup>-3</sup> | 9.12 x 10 <sup>-5</sup> | 1.91 x 10 <sup>-2</sup> | 8.33 x 10 <sup>-4</sup> | 4.14 x 10 <sup>-3</sup> | 3.90 x 10 <sup>-4</sup> | 3.07 x 10 <sup>-4</sup> | 1.02 x 10 <sup>-3</sup> | 2.39 x 10 <sup>-1</sup>      | 2.98 x 10 <sup>-4</sup> | 2.89 x 10 <sup>-6</sup> | 9.65 x 10 <sup>-3</sup> | 1.32 x 10 <sup>-4</sup> | 1.31 x 10 <sup>-4</sup> | 1.23 x 10 <sup>-5</sup> | 5.82 x 10 <sup>-6</sup> | 9.19 x 10 <sup>-5</sup> | 9.07 x 10 <sup>-3</sup>      |
|        | A20    | 9.14 x 10 <sup>-4</sup> | 5.20 x 10 <sup>-5</sup> | 1.72 x 10 <sup>-2</sup> | 5.00 x 10 <sup>-4</sup> | 6.56 x 10 <sup>-3</sup> | 7.10 x 10 <sup>-4</sup> | 7.60 x 10 <sup>-4</sup> | 1.02 x 10 <sup>-3</sup> | 3.25 x 10 <sup>-2</sup>      | 2.89 x 10 <sup>-5</sup> | 1.65 x 10 <sup>-6</sup> | 8.71 x 10 <sup>-3</sup> | 7.91 x 10 <sup>-5</sup> | 2.08 x 10 <sup>-4</sup> | 2.25 x 10 <sup>-5</sup> | 1.44 x 10 <sup>-5</sup> | 9.19 x 10 <sup>-5</sup> | 1.23 x 10 <sup>-3</sup>      |
|        | S21    | 4.65 x 10 <sup>-3</sup> | 1.28 x 10 <sup>-4</sup> | 2.93 x 10 <sup>-3</sup> | 5.17 x 10 <sup>-4</sup> | 2.68 x 10 <sup>-3</sup> | 4.20 x 10 <sup>-4</sup> | 1.12 x 10 <sup>-4</sup> | 1.28 x 10 <sup>-3</sup> | 2.63 x 10 <sup>-1</sup>      | 1.47 x 10 <sup>-4</sup> | 4.05 x 10 <sup>-6</sup> | 1.49 x 10 <sup>-3</sup> | 8.17 x 10 <sup>-5</sup> | 8.48 x 10 <sup>-5</sup> | 1.33 x 10 <sup>-5</sup> | 2.13 x 10 <sup>-6</sup> | 1.15 x 10 <sup>-4</sup> | 9.97 x 10 <sup>-3</sup>      |

**Table S6.** Hazard Index (HI) for the oral and dermal pathways and Total Hazard Index (THI) for those in the adult and children age categories exposed to spring waters collected in October 2019 (A19), May 2020 (S20), November 2020 (A20), and Spring 2021 (S21).

| Spring | Season | Adult                 |                       |                       | Children              |                       |                       |
|--------|--------|-----------------------|-----------------------|-----------------------|-----------------------|-----------------------|-----------------------|
|        |        | HI <sub>oral</sub>    | HI <sub>dermal</sub>  | THI                   | HI <sub>oral</sub>    | HI <sub>dermal</sub>  | THI                   |
| GWR1   | A19    | $7.30 \times 10^{-2}$ | $4.92 \times 10^{-3}$ | $7.79 \times 10^{-2}$ | $9.28 \times 10^{-2}$ | $1.06 \times 10^{-2}$ | $1.03 \times 10^{-1}$ |
|        | S20    | $6.64 \times 10^{-2}$ | $5.18 \times 10^{-3}$ | $7.16 \times 10^{-2}$ | $8.46 \times 10^{-2}$ | $1.33 \times 10^{-2}$ | $9.78 \times 10^{-2}$ |
|        | A20    | $7.55 \times 10^{-2}$ | $7.23 \times 10^{-3}$ | $8.27 \times 10^{-2}$ | $9.61 \times 10^{-2}$ | $2.02 \times 10^{-2}$ | $1.16 \times 10^{-1}$ |
|        | S21    | $7.53 \times 10^{-2}$ | $5.90 \times 10^{-3}$ | $8.12 \times 10^{-2}$ | $9.58 \times 10^{-2}$ | $1.48 \times 10^{-2}$ | $1.11 \times 10^{-1}$ |
| GWR2   | A19    | $1.19 \times 10^{-1}$ | $5.79 \times 10^{-3}$ | $1.24 \times 10^{-1}$ | $1.51 \times 10^{-1}$ | $7.18 \times 10^{-3}$ | $1.58 \times 10^{-1}$ |
|        | S20    | $1.48 \times 10^{-1}$ | $7.27 \times 10^{-3}$ | $1.55 \times 10^{-1}$ | $1.88 \times 10^{-1}$ | $9.15 \times 10^{-3}$ | $1.97 \times 10^{-1}$ |
|        | A20    | $1.57 \times 10^{-1}$ | $8.03 \times 10^{-3}$ | $1.65 \times 10^{-1}$ | $2.00 \times 10^{-1}$ | $1.06 \times 10^{-2}$ | $2.10 \times 10^{-1}$ |
|        | S21    | $1.58 \times 10^{-1}$ | $1.23 \times 10^{-2}$ | $1.70 \times 10^{-1}$ | $2.01 \times 10^{-1}$ | $2.96 \times 10^{-2}$ | $2.30 \times 10^{-1}$ |
| GWR3   | A19    | $5.82 \times 10^{-2}$ | $3.13 \times 10^{-3}$ | $6.13 \times 10^{-2}$ | $7.41 \times 10^{-2}$ | $4.79 \times 10^{-3}$ | $7.89 \times 10^{-2}$ |
|        | S20    | $7.14 \times 10^{-2}$ | $3.54 \times 10^{-3}$ | $7.49 \times 10^{-2}$ | $9.09 \times 10^{-2}$ | $4.95 \times 10^{-3}$ | $9.58 \times 10^{-2}$ |
|        | A20    | $5.99 \times 10^{-2}$ | $3.23 \times 10^{-3}$ | $6.31 \times 10^{-2}$ | $7.62 \times 10^{-2}$ | $4.83 \times 10^{-3}$ | $8.11 \times 10^{-2}$ |
|        | S21    | $1.21 \times 10^{-1}$ | $1.27 \times 10^{-2}$ | $1.34 \times 10^{-1}$ | $1.54 \times 10^{-1}$ | $3.75 \times 10^{-2}$ | $1.91 \times 10^{-1}$ |
| GWR5   | A19    | $5.64 \times 10^{-2}$ | $2.83 \times 10^{-3}$ | $5.92 \times 10^{-2}$ | $7.18 \times 10^{-2}$ | $4.04 \times 10^{-3}$ | $7.58 \times 10^{-2}$ |
|        | S20    | $5.37 \times 10^{-2}$ | $2.71 \times 10^{-3}$ | $5.64 \times 10^{-2}$ | $6.84 \times 10^{-2}$ | $4.39 \times 10^{-3}$ | $7.28 \times 10^{-2}$ |
|        | A20    | $6.12 \times 10^{-2}$ | $3.68 \times 10^{-3}$ | $6.49 \times 10^{-2}$ | $7.79 \times 10^{-2}$ | $6.83 \times 10^{-3}$ | $8.48 \times 10^{-2}$ |
|        | S21    | $8.91 \times 10^{-2}$ | $9.38 \times 10^{-3}$ | $9.85 \times 10^{-2}$ | $1.13 \times 10^{-1}$ | $2.81 \times 10^{-2}$ | $1.42 \times 10^{-1}$ |
| GWR6   | A19    | $1.30 \times 10^{-1}$ | $6.42 \times 10^{-3}$ | $1.37 \times 10^{-1}$ | $1.66 \times 10^{-1}$ | $8.33 \times 10^{-3}$ | $1.74 \times 10^{-1}$ |
|        | S20    | $1.11 \times 10^{-1}$ | $5.27 \times 10^{-3}$ | $1.16 \times 10^{-1}$ | $1.41 \times 10^{-1}$ | $6.73 \times 10^{-3}$ | $1.48 \times 10^{-1}$ |
|        | A20    | $9.16 \times 10^{-2}$ | $5.19 \times 10^{-3}$ | $9.67 \times 10^{-2}$ | $1.17 \times 10^{-1}$ | $8.40 \times 10^{-3}$ | $1.25 \times 10^{-1}$ |
|        | S21    | $1.77 \times 10^{-1}$ | $1.71 \times 10^{-2}$ | $1.94 \times 10^{-1}$ | $2.26 \times 10^{-1}$ | $4.84 \times 10^{-2}$ | $2.74 \times 10^{-1}$ |
| GWR7   | A19    | $3.93 \times 10^{-2}$ | $3.27 \times 10^{-3}$ | $4.26 \times 10^{-2}$ | $5.00 \times 10^{-2}$ | $8.57 \times 10^{-3}$ | $5.86 \times 10^{-2}$ |
|        | S20    | $5.61 \times 10^{-2}$ | $5.79 \times 10^{-3}$ | $6.19 \times 10^{-2}$ | $7.13 \times 10^{-2}$ | $1.51 \times 10^{-2}$ | $8.65 \times 10^{-2}$ |
|        | A20    | $2.02 \times 10^{-1}$ | $1.22 \times 10^{-2}$ | $2.14 \times 10^{-1}$ | $2.57 \times 10^{-1}$ | $2.20 \times 10^{-2}$ | $2.79 \times 10^{-1}$ |
|        | S21    | $1.21 \times 10^{-1}$ | $1.47 \times 10^{-2}$ | $1.36 \times 10^{-1}$ | $1.54 \times 10^{-1}$ | $4.35 \times 10^{-2}$ | $1.98 \times 10^{-1}$ |
| GWR8   | A19    | $1.30 \times 10^{-1}$ | $6.26 \times 10^{-3}$ | $1.37 \times 10^{-1}$ | $1.66 \times 10^{-1}$ | $7.63 \times 10^{-3}$ | $1.73 \times 10^{-1}$ |
|        | S20    | $1.32 \times 10^{-1}$ | $6.52 \times 10^{-3}$ | $1.38 \times 10^{-1}$ | $1.68 \times 10^{-1}$ | $9.00 \times 10^{-3}$ | $1.77 \times 10^{-1}$ |
|        | A20    | $1.11 \times 10^{-1}$ | $5.81 \times 10^{-3}$ | $1.17 \times 10^{-1}$ | $1.41 \times 10^{-1}$ | $8.44 \times 10^{-3}$ | $1.50 \times 10^{-1}$ |
|        | S21    | $1.54 \times 10^{-1}$ | $1.58 \times 10^{-2}$ | $1.69 \times 10^{-1}$ | $1.96 \times 10^{-1}$ | $4.65 \times 10^{-2}$ | $2.42 \times 10^{-1}$ |
| GWR9   | A19    | $2.46 \times 10^{-1}$ | $1.48 \times 10^{-2}$ | $2.61 \times 10^{-1}$ | $3.13 \times 10^{-1}$ | $2.63 \times 10^{-2}$ | $3.39 \times 10^{-1}$ |
|        | S20    | $2.15 \times 10^{-1}$ | $1.19 \times 10^{-2}$ | $2.27 \times 10^{-1}$ | $2.74 \times 10^{-1}$ | $1.94 \times 10^{-2}$ | $2.93 \times 10^{-1}$ |
|        | A20    | $4.73 \times 10^{-2}$ | $3.91 \times 10^{-3}$ | $5.12 \times 10^{-2}$ | $6.02 \times 10^{-2}$ | $1.04 \times 10^{-2}$ | $7.06 \times 10^{-2}$ |
|        | S21    | $2.16 \times 10^{-1}$ | $1.04 \times 10^{-2}$ | $2.27 \times 10^{-1}$ | $2.75 \times 10^{-1}$ | $1.19 \times 10^{-2}$ | $2.87 \times 10^{-1}$ |
